# 1 **Spatial single-cell profiling of intracellular metabolomes *in situ***

2 Luca Rappez<sup>1,2</sup>, Mira Stadler<sup>3</sup>, Sergio Triana<sup>1,2</sup>, Prasad Phapale<sup>4</sup>, Mathias Heikenwalder<sup>3</sup>,  
3 Theodore Alexandrov<sup>1,4,5,\*</sup>

4 <sup>1</sup> Structural and Computational Biology Unit, European Molecular Biology Laboratory (EMBL),  
5 Heidelberg, 69117 Germany; <sup>2</sup> Collaboration for joint PhD degree between EMBL and Heidelberg  
6 University, Faculty of Biosciences, Germany; <sup>3</sup> Institute of Chronic Inflammation and Cancer, Deutsches  
7 Krebs-Forschungszentrum (DKFZ), 69120 Heidelberg, Germany; <sup>4</sup> Metabolomics Core Facility, EMBL,  
8 Heidelberg, 69117 Germany; <sup>5</sup> Skaggs School of Pharmacy and Pharmaceutical Sciences, University of  
9 California San Diego, CA 92093, La Jolla, USA

10 \* Correspondence: [theodore.alexandrov@embl.de](mailto:theodore.alexandrov@embl.de)

11

12 -

13

## 14 Summary

15 The recently unveiled extent of cellular heterogeneity demands for single-cell investigations of  
16 intracellular metabolomes to reveal their roles in intracellular processes, molecular  
17 microenvironment and cell-cell interactions. To address this, we developed SpaceM, a method  
18 for *in situ* spatial single-cell metabolomics of cell monolayers which detects >100 metabolites in  
19 >10000 individual cells together with fluorescence and morpho-spatial cellular features. We  
20 discovered that the intracellular metabolomes of co-cultured human HeLa cells and mouse  
21 NIH3T3 fibroblasts predict the cell type with 90.4% accuracy and revealed a short-distance  
22 metabolic intermixing between HeLa and NIH3T3. We characterized lipid classes composing  
23 lipid droplets in steatotic differentiated human hepatocytes, and discovered a preferential  
24 accumulation of long-chain phospholipids, a co-regulation of oleic and linoleic acids, and an  
25 association of phosphatidylinositol monophosphate with high cell-cell contact. SpaceM provides  
26 single-cell metabolic, phenotypic, and spatial information and enables spatio-molecular  
27 investigations of intracellular metabolomes in a variety of cellular models.

28

## 29 Keywords

30 Spatial single-cell metabolomics, imaging mass spectrometry, microscopy, heterogeneity,  
31 metabolic intermixing, macrovesicular steatosis, lipid droplets, cell-cell contact, SpaceM

32

## 33 Introduction

34 Multicellular organisms contain a multitude of cells of distinct and diverse functions,  
35 morphologies, and molecular compositions. Each single cell has a unique intracellular  
36 metabolome, a dynamic repertoire of metabolites and lipids involved in virtually all cellular  
37 processes. Aside with metabolites and lipids serving as building blocks and energy sources  
38 within the cell, recent discoveries unveiled their roles in signaling (Wellen and Thompson,  
39 2012), epigenome regulation (Sharma and Rando, 2017), immunity (Buck et al., 2017),  
40 inflammation (Murphy and O'Neill, 2018), host-microbe interactions (Sharon et al., 2014), and  
41 cancer (Pavlova and Thompson, 2016). At the same time, the progress of single-cell technologies  
42 revealed the extent and biological functions of cellular heterogeneity (Altschuler and Wu, 2010)  
43 within tissues, organs (Marioni and Arendt, 2017), tumors (Patel et al., 2014), and even among  
44 monoclonal cells in culture (Lee et al., 2014; Pelkmans, 2012; Russell et al., 2018). The  
45 discovered critical roles of metabolism and the growing awareness of a hidden world beneath  
46 population averages created an urgent need to investigate intracellular metabolism at the single-  
47 cell level (Rubakhin et al., 2013; Zenobi, 2013). In the recent years, the sensitivity of mass  
48 spectrometry-based metabolite detection has improved substantially opening novel avenues to  
49 metabolomics of either single cells or small groups of cells (Do et al., 2017; Guillaume-Gentil et  
50 al., 2017; Ibáñez et al., 2013; Merrill et al., 2017) and even at a subcellular level (Passarelli et al.,  
51 2017). However, despite these methods successfully demonstrated detection of metabolites in  
52 individual cells, analytical and computational challenges precluded studies of spatio-molecular  
53 organization and cellular heterogeneity, and prevented discovering the links between  
54 intracellular metabolomes, cellular phenotypes and spatial organisation of cells.

55 To bridge this gap, we designed SpaceM, a method for spatial single-cell metabolomics of cell  
56 monolayers that integrates MALDI-imaging mass spectrometry with bright-field and  
57 fluorescence microscopy. Integration with microscopy enables associating metabolites with  
58 fluorescence and morphological cell properties (fluorescent reporter intensity, area, compactness,  
59 shape) as well as with spatial features quantifying multi-cellular organization. The integration  
60 was enabled by a method for precise detection of parts of cells sampled by MALDI laser with the  
61 help of sequential microscopy, novel image analysis, and a novel cell-ablation marks  
62 normalisation strategy. Using the False Discovery Rate-controlled metabolite annotation, and  
63 novel methods for unbiased selection of intracellular metabolites and for filtering out poor  
64 quality cells allowed us to perform high-throughput analyses with >100 metabolites detected in  
65 >10000 individual cells, with a high reproducibility between replicates. We validated SpaceM by  
66 investigating metabolomes of co-cultured HeLa and mouse fibroblasts cells as well as of  
67 differentiated human steatotic hepatocytes stimulated with pro-inflammatory factors that  
68 provided rich metabolic, phenotypic, and spatial information.



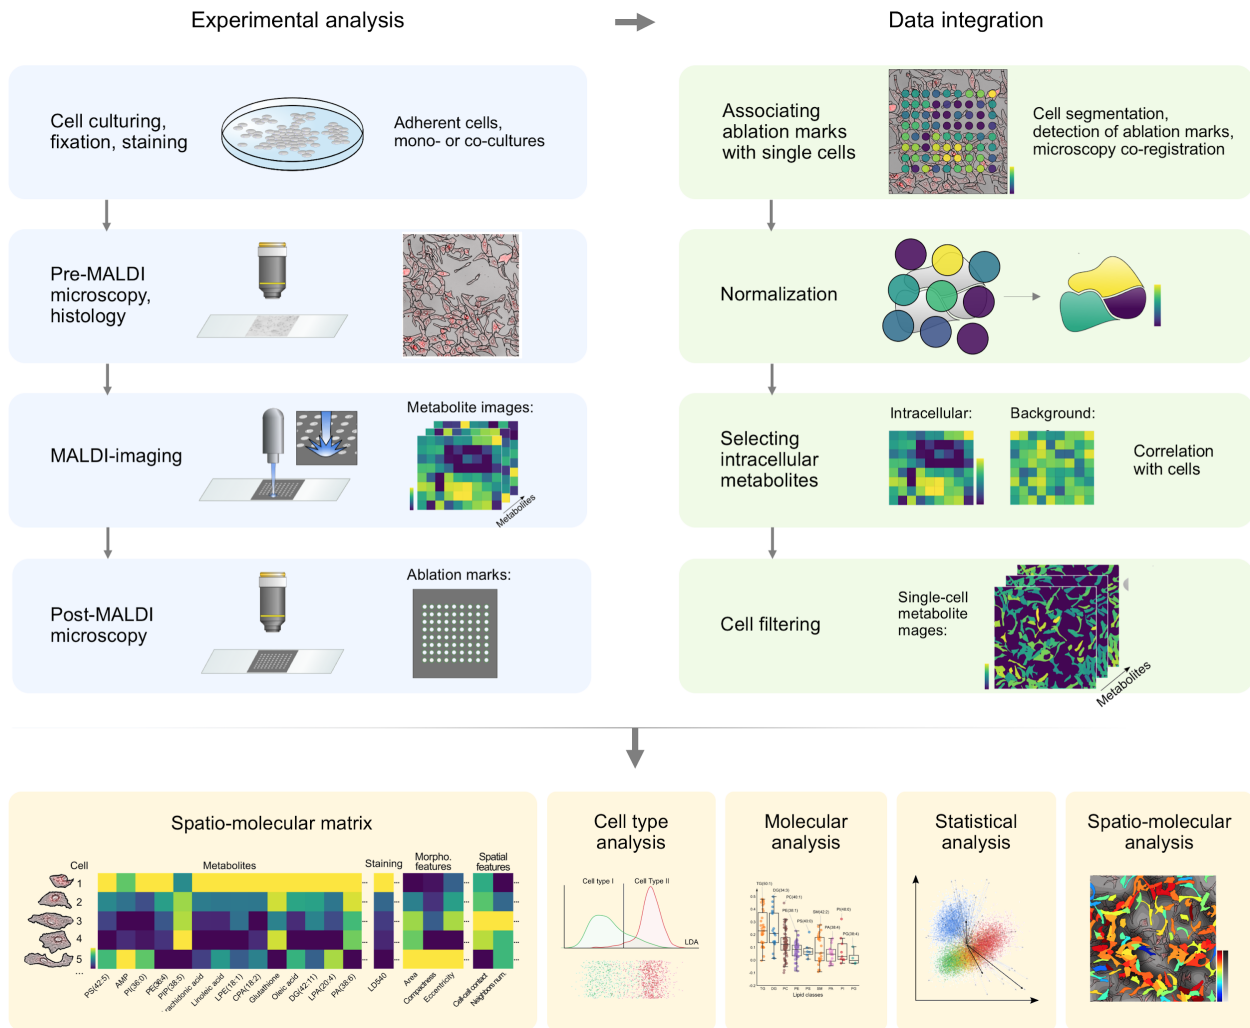

69

70 **Figure 1. SpaceM method for spatial single-cell metabolomics of cell monolayers by**  
 71 **integrative microscopy and MALDI imaging mass spectrometry.** The experimental part of the  
 72 workflow includes cell culturing, pre-MALDI and post-MALDI microscopy and histology, and  
 73 MALDI imaging mass spectrometry. The data integration part includes associating of MALDI  
 74 laser ablation marks with individual cells, strategies for normalization, selecting intracellular  
 75 metabolites, and cell filtering (see Figure S1 for a detailed workflow). SpaceM outputs a single-  
 76 cell spatio-molecular matrix providing rich information for a variety of analyses, in particular to  
 77 characterise cell types, associate single-cell metabolomes with a fluorescent phenotype,

78 *interrogate changes of single-cell metabolomes upon perturbations, and discover spatio-*  
79 *molecular associations.*

80

## 81 Results

### 82 **The SpaceM method**

83 SpaceM relies on using Matrix Assisted Laser Desorption Ionization (MALDI)-imaging mass  
84 spectrometry, a spatially-resolved mass spectrometry technology for detection of a wide range of  
85 molecules (Baker et al., 2017). MALDI-imaging is increasingly used for spatial metabolomics  
86 (Palmer et al., 2016) and was demonstrated to achieve the femtomolar-levels sensitivity  
87 (Soltwisch et al., 2015). This, together with soft ionisation preventing excessive in-source  
88 molecular fragmentation makes it a perfect choice for single-cell metabolomics as demonstrated  
89 by others (Do et al., 2017; Ibáñez et al., 2013). The experimental part of SpaceM combines  
90 MALDI-imaging with microscopy as well as with collecting supporting information to integrate  
91 these two sources of data (Figure 1; for a detailed workflow see Figure S1). The cells for  
92 SpaceM are cultured on a labtek chamber glass slide in a monolayer, with the cell confluence  
93 sufficient to allow cells to interact between each other but at the same time preventing the growth  
94 of cells on top of each other. After washing, cells are fixed to halt enzymatic activity, stained  
95 with a fluorescent dye with the staining protocol compatible with metabolomics, and dried in a  
96 desiccator following regular cell preparation protocols. SpaceM requires the Hoechst (or any  
97 similar) staining for nuclei detection. For investigation of the steatotic hepatocytes, we also used  
98 the lipophilic LD540 staining to detect lipid droplets (Spandl et al., 2009). Then, bright-field and  
99 fluorescence microscopy images of cells are collected with the following two aims in mind.

100 First, the cell segmentation of the microscopy images provides cell outlines and enables cell  
101 localization. Second, microscopy provides rich phenotypic information about single-cell  
102 fluorescence, immunochemistry and spatio-morphological properties of the cells. In the next  
103 experimental step, MALDI-imaging is applied to the dried cells to collect mass spectra across  
104 cells and extracellular areas. MALDI-imaging procedure starts with application of an ionisation-  
105 enhancing matrix. Similar to MALDI-imaging of tissues, we used a robotic sprayer for enhanced  
106 extraction, high spatial resolution, and high reproducibility. MALDI-imaging generates big  
107 datasets with millions of mass-to-charge channels. For finding metabolic signals in this data, we  
108 exploited the False Discovery Rate-controlled metabolite annotation implemented as the  
109 METASPACE cloud software (<http://metaspace2020.eu>) (Palmer et al., 2017). METASPACE is  
110 an essential step as it reduces millions of mass-to-charge (m/z)-values to ~100 metabolite  
111 annotations, filters out signals representing matrix and contaminants, ensures quality control and  
112 represents metabolite images a user-friendly way. In the last experimental step, we performed  
113 post-MALDI microscopy to determine which cells were sampled by the MALDI-imaging laser  
114 and to associate MALDI-imaging spectra with the cells. Next, we performed data integration  
115 with the first step associating ablation marks with individual cells. We detected MALDI laser  
116 ablation marks in post-MALDI microscopy images using a customized 2D Fourier  
117 Transformation image analysis method that exploits similarities between ablation marks and the  
118 regularity in spacings between them. Then, we obtained positions of the MALDI-imaging  
119 ablation marks within the cell areas by co-registering pre-MALDI microscopy images  
120 (containing cell outlines) with post-MALDI microscopy images (containing ablation marks  
121 outlines) (Figure S2). For a majority of cells, a cell was sampled with just one ablation mark. In  
122 our benchmarking experiment with HeLa cells and NIH3T3 fibroblast (described later), 72.25%,

123 23.8%, 2.8%, 0.9% cells were sampled with 1, 2, 3, 4 ablation marks, respectively. To integrate  
 124 metabolic profiles from several ablation marks co-sampling the same cell as well as to reduce the  
 125 confusion of co-sampled cells, we developed a cell-ablation marks normalization strategy  
 126 (Figure 2). The normalization provides the metabolite intensity normalized by the area that is a  
 127 natural readout for metabolite concentration. Next, we developed a strategy to distinguish  
 128 intracellular from extracellular metabolites by requiring an intracellular metabolite intensities to  
 129 be highly correlated with the cell spatial distribution. Finally, similar to cell filtration strategies  
 130 in single-cell RNA-seq (Ilicic et al., 2016), we filter out poor-quality cells with low numbers of  
 131 metabolite annotations with the cutoff determined as the 5%-percentile of the numbers of  
 132 annotations for all cells in an experiment.

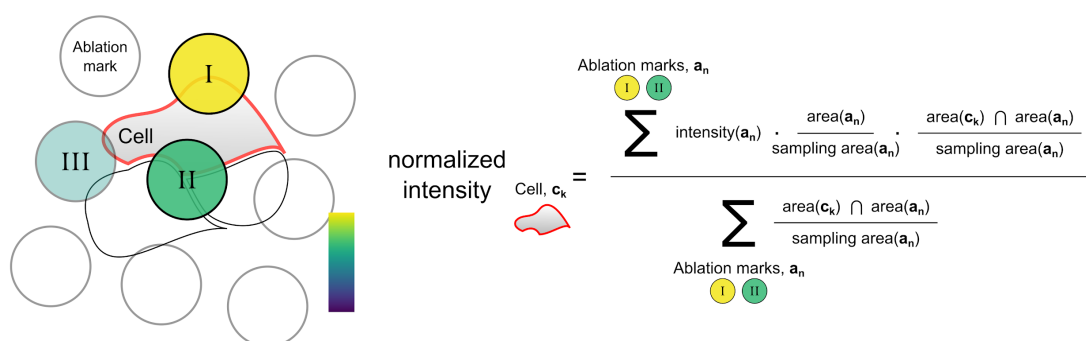

133  
 134 **Figure 2. Normalization strategy for assigning metabolic intensities to individual cells.** The  
 135 intensity assigned to a cell for a given metabolite is calculated as a weighted mean of the  
 136 metabolite intensities from the ablation marks sampling that cell. To increase the contribution of  
 137 ablation marks which mainly sample the cell of interest, the weight of each ablation mark is  
 138 proportional to the overlap of the ablation mark and the cell. To reduce the contribution of  
 139 ablation marks which mainly sample extracellular areas, the weight of each ablation mark is  
 140 reversely proportional to its extracellular sampling area. Ablation marks sampling  
 141 predominantly extracellular areas are filtered out (as the illustrated here ablation mark III).

142 *area(a<sub>n</sub>) stands for the area of ablation mark a<sub>n</sub>; sampling area(a<sub>n</sub>) stands for the intracellular*  
143 *area of ablation mark a<sub>n</sub>; area(c<sub>k</sub>) stands for the area of cell c<sub>k</sub>; all areas are computed in*  
144 *microscopy pixels.*

145 Ultimately, SpaceM provides a single-cell spatio-molecular matrix that, for each cell, comprises  
146 a multiplex readout of the cell metabolic profile, fluorescence intensity, morphological features,  
147 and spatial features (Figure 1). This information enables statistical analysis, phenotype-  
148 metabolome correlation, and/or spatio-molecular interrogation of single cells in the genuine  
149 spatial context.

#### 150 **SpaceM predicts cell types with single-cell resolution**

151 For validation of the method, we evaluated whether SpaceM can predict the cell type of  
152 spatially-heterogeneous co-cultured human HeLa cells and mouse NIH3T3 fibroblasts (Figure  
153 3). We considered six samples (two replicates of co-cultures, and two replicates of control  
154 monocultures for each cell type). HeLa and NIH3T3 cells constitutively expressed H2B-mCherry  
155 and GFP, respectively, making them easily discernible by fluorescence microscopy. Automated  
156 assignment of the cell type was done using a linear separating boundary between mCherry and  
157 GFP fluorescence intensities (Figure 3A). Overall, metabolic profiles of 88 metabolites with an  
158 FDR≤10% in at least one sample were obtained for 1624 cells in co-cultures (958 HeLa and 666  
159 NIH3T3 cells) and 2197 cells in monocultures (1603 HeLa and 594 NIH3T3 cells). Support  
160 Vector Machine classification of the single-cell metabolic profiles with the 10-fold cross-  
161 validation for unbiased choice of the Gaussian kernel gamma predicted the cell type with 90.4%  
162 accuracy for the co-cultured cells. To evaluate the richness of the detected metabolic profiles, we  
163 used only a random subset of all 88 metabolites and were able to consistently predict the cell

164 type in co-cultures with 87.6% accuracy even when using only a half of all detected metabolites  
165 (Figure 3B). This indicates the richness of the detected intracellular metabolomes and its  
166 biological relevance in the context of cell type classification. Moreover, by applying the  
167 statistical t-test we have identified the molecular markers of each cell type in co-cultures, with  
168 the phosphatidylinositols PI(34:1), PI(34:2) found to be the most statistically significant and  
169 exhibiting the highest fold change in HeLa cells.

170 In order to assess whether the metabolic profiles can predict the cell type with a single-cell  
171 resolution, we evaluated a case of a fibroblast surrounded by HeLa cells (Figure 3D). As shown  
172 in Figure 3E, its cell type was predicted correctly. The phosphoethanolamine PE(40:6), the  
173 fibroblast marker for NIH3T3 with the highest fold change (Figure 3F) is exhibiting a higher  
174 intensity in the fibroblast compared to the surrounding HeLa cells. Interestingly, the visualization  
175 of the intensities of the most significant HeLa marker PI(34:1) shows high cell-cell heterogeneity  
176 among the HeLa cells (Figure 3G), confirming that it is a combination of several metabolites that  
177 enables prediction of the HeLa cell type.

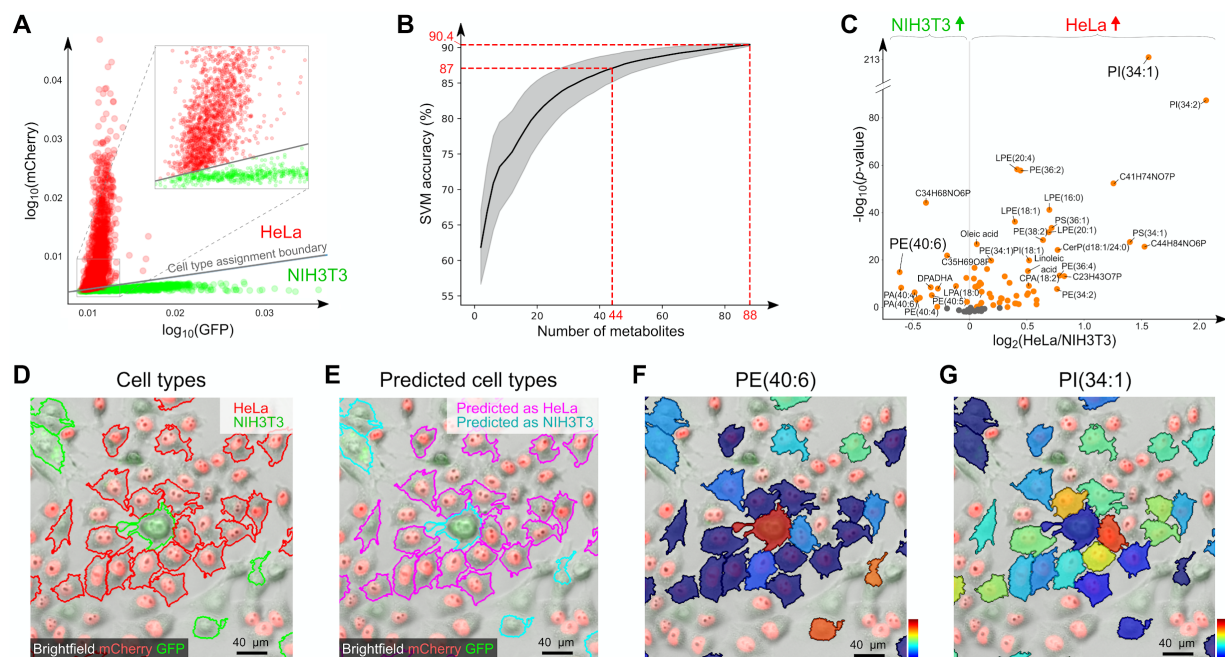

178  
 179 **Figure 3. SpaceM can predict the cell type of co-cultured HeLa cells and NIH3T3 fibroblasts**  
 180 **based on their intracellular metabolomes, with single-cell resolution. A:** Automated assignment  
 181 of the cell type for co-cultured HeLa and NIH3T3 cells ( $n=3821$ ) was done using a linear  
 182 separating boundary between mCherry and GFP fluorescence intensities. **B:** Using single-cell  
 183 metabolic profiles, we could predict the cell type with 90.4% accuracy; even when using only  
 184 half of the detected metabolites, we could predict the cell type with 87.6% accuracy on average  
 185 indicating the richness and the relevance of the detected metabolomes; Support Vector Machine  
 186 with 10-fold cross validation was used for classification; the plot shows the median accuracy for  
 187 1000 random repetitions when subsampling the metabolites, with the grey area showing the  
 188 confidence intervals of  $\pm$  one standard deviation. **C:** Volcano plot ( $\log_2$  of the fold change  
 189 HeLa/NIH3T3 vs.  $-\log_{10}$  of the t-test p-value) showing differential properties 88 detected  
 190 metabolites and lipids. **D:** Area of the co-cultured cells showing an NIH3T3 cell surrounded by  
 191 HeLa cells; the sampled cells are outlined according to their assigned type. **E:** SpaceM  
 192 demonstrates single-cell resolution allowing correct prediction the cell type of the NIH3T3 cell



193 *surrounded by HeLa cells. F-G: Single-cell metabolite images for two markers highlighted in*  
194 *Figure 2E: phosphoethanolamine PE(40:6) and phosphatidylinositol PI(34:1) validated using*  
195 *LC-MS/MS (Data S1); despite the single-cell metabolite images exhibiting visually-noticeable*  
196 *heterogeneity, the full metabolic profile let predict the cell type with a high accuracy indicating*  
197 *the richness of the detected metabolomes and their relevance for each cell type.*

198

### 199 **Intermixing of metabolomes of co-cultured HeLa and NIH3T3**

200 Intriguingly, the detected intracellular metabolomes of co-cultured cells were different from  
201 metabolomes of their monocultured counterparts (Figure 4). The co-culturing was optimized to  
202 achieve high spatial heterogeneity so that cells of one type have neighbors of another type  
203 (Figure 4A-B). We observed that upon co-culturing, the single-cell metabolomes of one cell type  
204 become more similar to the single-cell metabolomes of another cell type as compared to their  
205 monocultured counterparts (Figure 4C). The values of the metabolic discriminant do not overlap  
206 between the monocultured HeLa and NIH3T3 (Figure 4C, with the 90% confidence interval  
207 shown monocultured cells of each type). However, for the co-cultured cells, 39.2% of NIH3T3  
208 cells (and 48.2% of HeLa cells) exhibit the values of the metabolic discriminant in the mixing  
209 region between the cell types or even take the values within the confidence interval of the other  
210 type. This observation of metabolic intermixing between co-cultured cells was further supported  
211 by results from predicting the cell type based on single-cell intracellular metabolomes. Whereas  
212 we could predict the cell type of co-cultured cells with 90.4% accuracy, for the monocultured  
213 cells we could predict their cell type with a higher accuracy of 96.6%.

214 Furthermore, we discovered that the metabolic intermixing between cells of two types happens  
215 locally and can be considered a short-distance effect. The extent of the metabolic intermixing for



216 NIH3T3 cells depends on the presence of HeLa in their close vicinity (Figure 4D). We estimated  
217 that the metabolic intermixing is the strongest at the distance of 58  $\mu\text{m}$  for NIH3T3 and 107  $\mu\text{m}$   
218 for HeLa, with NIH3T3 affected most ( $r_s=0.43$ ,  $-\log_{10}(p\text{-value})=17.5$  compared to  $r_s=-0.18$ ,  $-\log_{10}(p\text{-value})=3.8$ ). We evaluated whether the observed metabolic intermixing can be observed  
219 either due to metabolite delocalization during sample preparation or due to co-ablation of cells.  
220 Sample preparation is known to be a key to achieve high spatial resolution MALDI-imaging.  
221 Particularly critical is the application of the MALDI matrix, since it can cause metabolite  
222 delocalization either during matrix crystallization as crystals can contain analytes from the whole  
223 crystal footprint, or due to metabolite leakage while spraying the matrix solution. We have  
224 developed a strategy to quantify metabolite delocalization (Figure 4G) that showed that most of  
225 metabolites (65 of 88) are well-localized. The delocalized metabolites such as  
226 lysophosphoethanolamine LPE(18:0) (see Figure G, cf. well-localized LPE(18:1)) showed only  
227 minor levels of delocalization with median distance outside of cells  $<5 \mu\text{m}$ . Importantly, even  
228 when using only well-localized metabolites, SpaceM could predict the cell type with 88.9%  
229 accuracy. The fact that the cell type prediction accuracy did not increase after considering  
230 localized metabolites only suggests that delocalization does not explain the observed intermixing  
231 between the cell types. Next, we evaluated whether co-ablation of cells can be a reason for the  
232 observed metabolic intermixing. We considered only the cells which had uniquely-associated  
233 ablation marks and excluded 878 cells which were co-sampled (having co-sampling ablation  
234 marks, Figure 4H). Still, considering both well-localized metabolites and cells without co-  
235 sampling ablation marks only (444 HeLa, 332 NIH3T3) we could predict the cell type with  
236 90.7% accuracy. The lack of the difference in the prediction accuracy (cf. 90.4% for all  
237 metabolites and all cells) suggests that co-sampling of cells does not explain the observed  
238

239 metabolic intermixing. In summary, this data indicates that the metabolic intermixing might be a  
 240 short-distance biological effect when a cell of one type has neighbors of another type in close  
 241 vicinity and that NIH3T3 cells are stronger affected than HeLa cells.

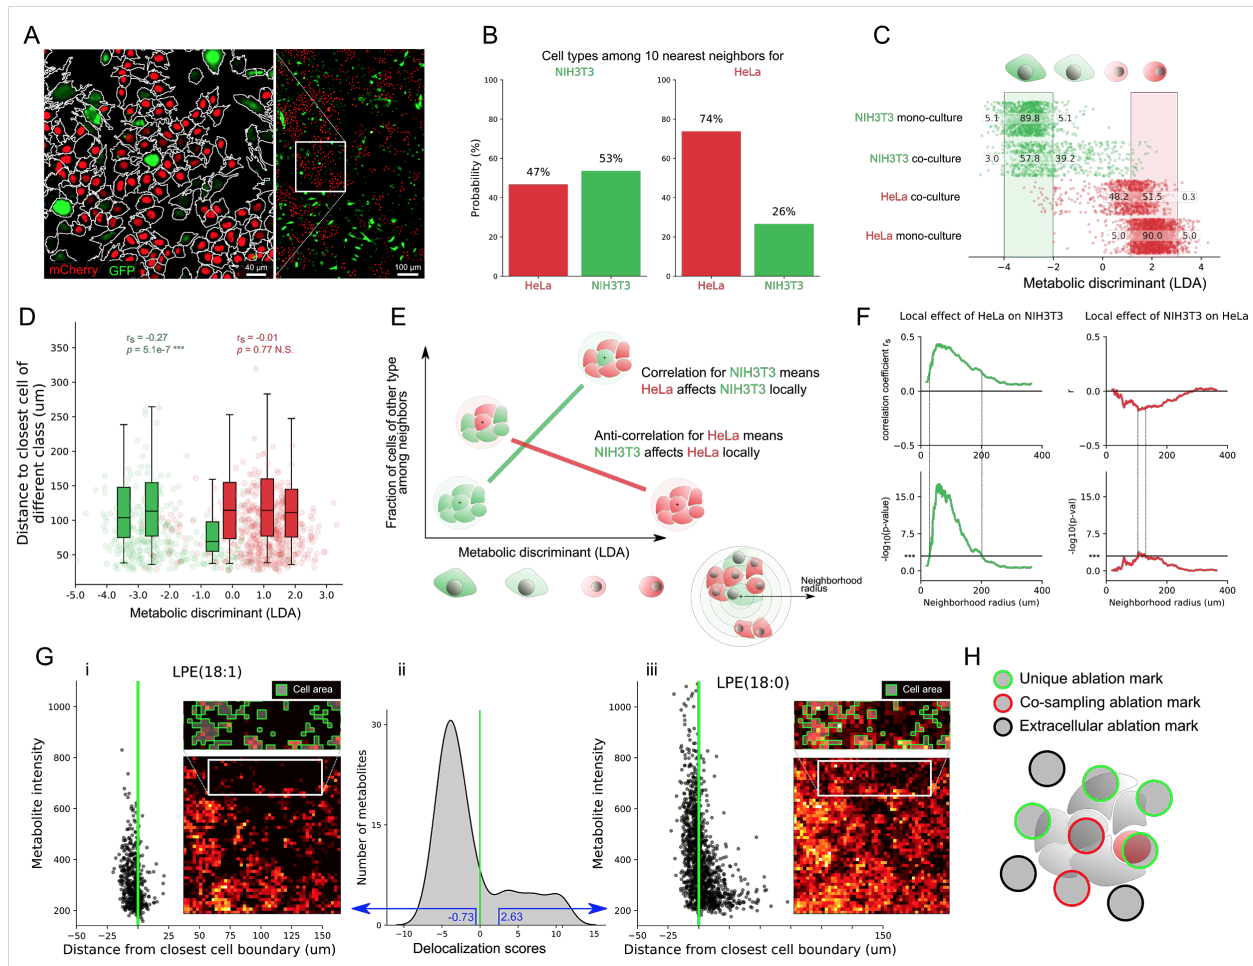

242  
 243 **Figure 4. Metabolic intermixing of co-cultured HeLa and NIH3T3 fibroblasts. A:** Illustration  
 244 of the spatial heterogeneity of co-cultured HeLa (H1B-mCherry, red) and NIH3T3 (GFP, green).  
 245 **B:** Quantification of the spatial heterogeneity showing that, for each cell type, individual cells  
 246 are surrounded by cells of other type (on average, an NIH3T3 cell has 47% HeLa among 10  
 247 closest neighbors, a HeLa cell has 26% NIH3T3). **C:** Less pronounced difference between HeLa  
 248 and NIH3T3 cells in co-cultures compared to their monocultured counterparts suggests

249 *metabolic intermixing between the cell types, here visualized with the values of the Linear*  
250 *Discriminant Analysis (LDA) discriminant of the single-cell metabolic profiles; the cells are*  
251 *colored and plotted against its cell type and whether they were cultured in co- or mono-culture;*  
252 *the cell type for co-cultured cells was determined using their fluorescence; the vertical bars*  
253 *indicate the 90%-confidence intervals for each monocultured cell type. **D:** The metabolomes of*  
254 *NIH3T3 cells are affected most when they have HeLa cells in close vicinity with distance*  
255 *between cell centers of 50-100  $\mu\text{m}$ , whereas the average diameter of a HeLa cell equal to 6.7*  
256 *( $\pm$  1.7)  $\mu\text{m}$  and of NIH3T3 equal to 8 ( $\pm$  2.47)  $\mu\text{m}$ . **E:** Illustration explaining the calculation*  
257 *of the distance of the metabolic intermixing effect, per cell type: For each cell, we consider a*  
258 *neighborhood of particular radius, and calculate a fraction of cells of the other type in this*  
259 *neighborhood. The radius for which this property is most correlated (for NIH3T3 cells) or anti-*  
260 *correlated (for HeLa cells) with the metabolic discriminant (LDA) corresponds to the distance of*  
261 *the intermixing effect. **F:** NIH3T3 cells are most affected by HeLa at the distance of 58  $\mu\text{m}$ ;*  
262 *HeLa cells are mainly affected by NIH3T3 cells at the distance of 120  $\mu\text{m}$ , with the correlation*  
263 *coefficient and p-values indicating the smaller extend of this effect compared to NIH3T3. **G:***  
264 *Evaluation of the metabolite delocalization confirmed that the metabolic intermixing cannot be*  
265 *explained by the metabolite delocalization between neighboring cells. The scatterplots for*  
266 *ablation marks for lysophosphoethanolamines LPE(18:1) (i) and LPE(18:0) (iii) show how their*  
267 *metabolite intensities depend on the distance to the nearest cell boundary (negative for*  
268 *intracellular ablation marks, positive for extracellular ablation marks). LPE(18:0) exemplifies a*  
269 *delocalized metabolite with the high metabolite intensities observed at the extracellular ablation*  
270 *marks at the distances of  $<50 \mu\text{m}$  from cells. LPE(18:1) exemplifies a well-localized metabolite*  
271 *detected predominantly in the intracellular ablation marks only. ii) a histogram of the*

272 *delocalization scores for all metabolites showing that most of the metabolites are well-localized;*  
273 *moreover, when considering only well-localized metabolites, SpaceM predicts the cell type with*  
274 *the classification accuracy 88.9% suggesting that despite a minority of metabolites (23 out of 88)*  
275 *having positive delocalization scores, the metabolic intermixing between the cell types is not*  
276 *explained by the delocalization. **H:** We confirmed that the metabolic intermixing is not due to the*  
277 *co-sampling of cells (when an ablation mark samples more than one cell e.g. as illustrated with*  
278 *red outlines), since even after considering only well-localized metabolites and excluding co-*  
279 *sampled SpaceM could predict the cell type with 90.7% accuracy (cf. 90.4% for all metabolites*  
280 *and cells). \*\*\* denotes  $p$ -values $<0.001$ ; N.S. stands for non-significant.*

## 281 **SpaceM discovers accumulation of long-chain lipids in steatotic hepatocytes**

282 Next, we used SpaceM to investigate the identity of intracellular metabolomes in differentiated  
283 human hepatocytes (dHepaRG). During the non-alcoholic fatty liver disease (NAFLD)  
284 hepatocytes are known to accumulate lipid droplets (LDs), which in the context of inflammation  
285 and necro-inflammation can lead to development of macrovesicular steatosis ([Ringelhan et al.](#)  
286 [2018](#); [Wolf et al. 2014](#)). We could recapitulate macrovesicular steatosis using human or murine  
287 hepatocytes *in vitro* ([Wolf et al. 2014](#)). In particular, the pro-inflammatory cytokine TNF $\alpha$  is  
288 known factor promoting steatotic phenotype in hepatocytes ([Jung and Choi 2014](#); [Nakagawa et](#)  
289 [al. 2014](#)). We noticed that the macrovesicular steatosis exhibits a high cell-cell heterogeneity  
290 (Figure 5A, Figure S3) and set to characterize the molecular composition of the LDs in steatotic  
291 hepatocytes.

292 We cultured monolayers of differentiated human hepatocytes dHepaRG, stimulated them with  
293 TNF $\alpha$  in combination with oleic and palmitic acids, and measured LD accumulation using the  
294 lipophilic fluorescent dye LD540 (Spandl et al., 2009). After applying SpaceM, we detected 167

295 metabolites (at an  $FDR \leq 10\%$ ) in 2370 cells. Principal component analysis (PCA) of the single-  
296 cell metabolic profiles revealed a significant correlation between the captured metabolome and  
297 the LD540 lipid fluorescence (Figure 5B). Triglycerides (TGs), diglycerides (DGs), and  
298 phosphatidylcholines (PCs) were identified as the key constituents of the LDs (Figure 5C). This  
299 is in line with neutral lipids, mainly DGs and TGs, known to compose the core of hepatic LDs,  
300 whereas polar lipids, primarily PCs, to compose the surface (Gluchowski et al., 2017; Ress and  
301 Kaser, 2016). Figure 5D shows a single-cell scatterplot for the most correlated lipid TG(50:1)  
302 visualizing statistically significant (with  $p\text{-value} < 0.001$ ) correlation of intensities of this lipid  
303 with the extent of the macrovesicular steatosis quantified with the LD540 fluorescence.  
304 Interestingly, for PCs, sphingomyelins, and phosphoethanolamines, the LD540 fluorescence was  
305 found to be positively correlated with the number of carbons suggesting that LDs in steatotic  
306 hepatocytes preferentially accumulate long-chain species of these phospholipids (Figure 5E).  
307 The opposite effect (negative correlation) was observed for di- and triglycerides albeit not  
308 significant (Figure 5F).

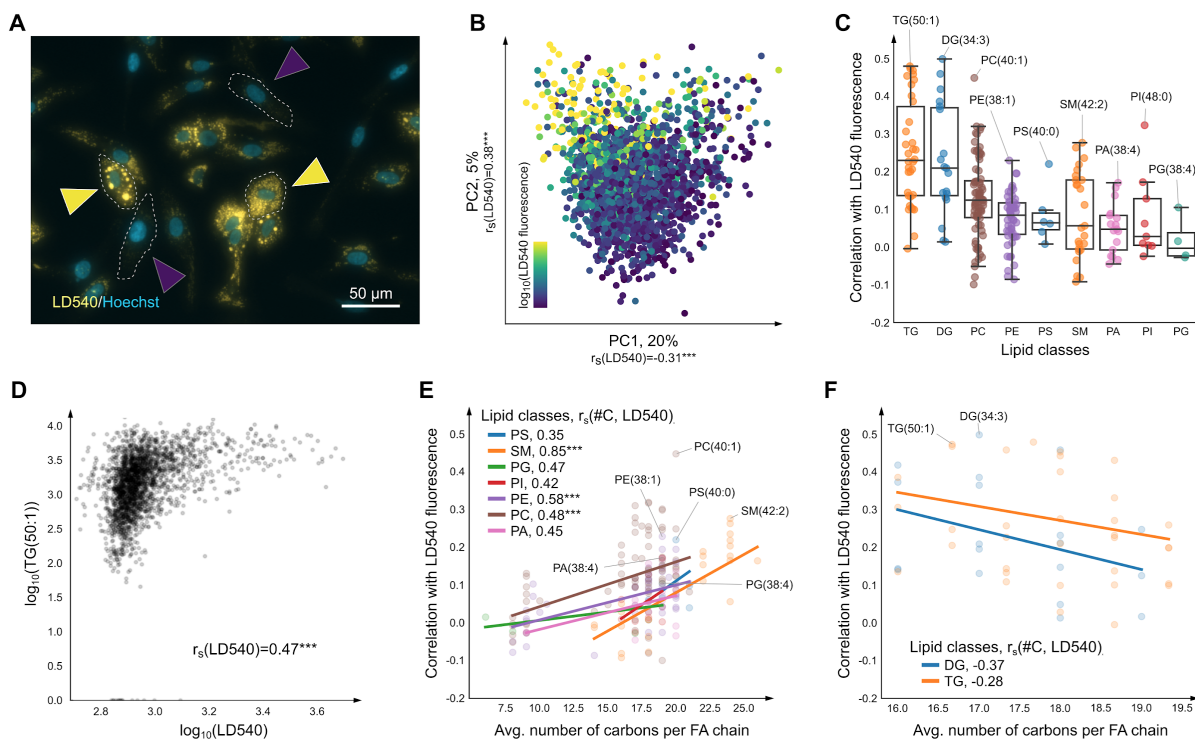

309

310 **Figure 5. Single-cell analysis of the molecular composition of lipid droplets (LDs) in steatotic**  
 311 **hepatocytes stimulated with TNF $\alpha$  (n=2370).** **A:** Cell-cell heterogeneity of macrovesicular  
 312 steatosis (LDs accumulation) in differentiated human hepatocytes stimulated with TNF $\alpha$  in  
 313 combination with oleic and palmitic fatty acids; the LD540 lipophilic staining highlights  
 314 intracellular lipid droplets; Hoechst highlights nuclei; the yellow/blue arrows indicate cells with  
 315 high/low steatosis. **B:** Positive Spearman correlations ( $r_s$ ) the single-cell principal components  
 316 of the z-scores of the single-cell metabolic profiles between the log10 of LD540 fluorescence  
 317 prove that the metabolic profiles represent lipid accumulation. **C:** Accumulation of various lipid  
 318 classes in LDs as measured by the single-cell Spearman correlations between LD540  
 319 fluorescence and intensities of 167 detected lipid species; tri- (TG), di-glycerides (DG), and  
 320 phosphocholines (PC) are the most correlated that is in line with them known to compose the  
 321 core (TG, DG) and surface (PC) of hepatic LDs. **D:** Single-cell scatterplot of the most-correlated  
 322 triglyceride TG(50:1), validated using LC-MS/MS (Data S1). **E:** For phosphocholines,



323 *sphingomyelins (SMs), and phosphoethanolamines (PEs), the LD540 fluorescence is*  
324 *significantly and positively correlated with the number of carbons (#C) suggesting that steatotic*  
325 *hepatocytes accumulate long-chain versions of these phospholipids; the number of carbons is*  
326 *computed as an average per fatty acid chain to be comparable between lipid classes. F: The*  
327 *opposite effect (negative correlation) was observed for di- and triglycerides albeit not*  
328 *significant. \*\*\* indicates significance with  $p$ -value  $\leq 0.001$ .*

### 329 **SpaceM discovers intracellular co-regulation of oleic and linoleic acid**

330 We previously found that mice fed a diet enriched with oleic and palmitic fatty acids developed  
331 key features of human metabolic syndrome, nonalcoholic steatohepatitis (NASH), and NASH-  
332 derived hepatocellular carcinoma (Wolf et al., 2014). To investigate on the single-cell level how  
333 the metabolome and lipidome of human hepatocytes is affected by different pro-inflammatory  
334 factors, we analyzed hepatocytes cultured under the following conditions: (i) CTRL, untreated  
335 cells, (ii) FA, cells stimulated with oleic and palmitic fatty acids (opFAs), (iii) LPS, cells  
336 stimulated with a pathogen-associated molecular pattern lipopolysaccharide and opFAs and (iv)  
337 TNF $\alpha$ , cells stimulated with TNF $\alpha$  and opFAs. SpaceM obtained metabolic profiles of 136  
338 metabolites for 22258 cells in total with a batch correction applied to three randomized technical  
339 replicates per condition (Table S1, Figure S4). LD540 staining of differentiated, stimulated  
340 human hepatocytes revealed lipid accumulation and macrovesicular steatosis (Figs. 5A, S6, S8).  
341 PCA of single-cell metabolic profiles indicates the captured differences in the metabolomes of  
342 untreated and stimulated cells (Figure 6A). The metabolic shifts between different conditions  
343 reflected the expected levels of response to the stimuli as (i) opFAs used for stimulation in the  
344 FA condition were also supplemented in the LPS and TNF condition, (ii) TNF $\alpha$  specifically  
345 induced the strongest TNF-receptor signaling whereas (iii) LPS only secondarily induces TNF

346 secretion and TNFR signaling at lower levels (Beutler, 2004). We investigated the contributions  
347 of individual metabolites to the principal components and found that, as expected, cells cultured  
348 with oleic acid accumulated intracellular oleic acid as compared to the untreated cells (Figure  
349 6B). Not all molecules showed elevated accumulation with the increase of the stimuli; see e.g.  
350 PIP(38:5) in Figure 4C which exhibits similar intensities between CTRL and FA with a clear  
351 increase in the TNF and even more in the LPS condition. Interestingly, opposite to oleic acid,  
352 linoleic acid (the second of the opFAs stimuli in the FA, LPS, TNF conditions) exhibits  
353 decreased levels in the stimulated cells (Figure 6D). Importantly, there is a clear correlation  
354 between the levels of the oleic and linoleic acids across all cells (Figure 6E). A similar effect of  
355 the inverse relation between oleic and linoleic acids levels was reported in the livers of mice fed  
356 a high-fat diet (da Silva-Santi et al., 2016). However, the bulk analysis could not discern whether  
357 the effect occurs in different cell subpopulations or is concerted within the same cells. Our  
358 single-cell analysis shows that the effect happens indeed within the same cells thus suggesting  
359 intracellular co-regulation of oleic and linoleic acid levels.

360



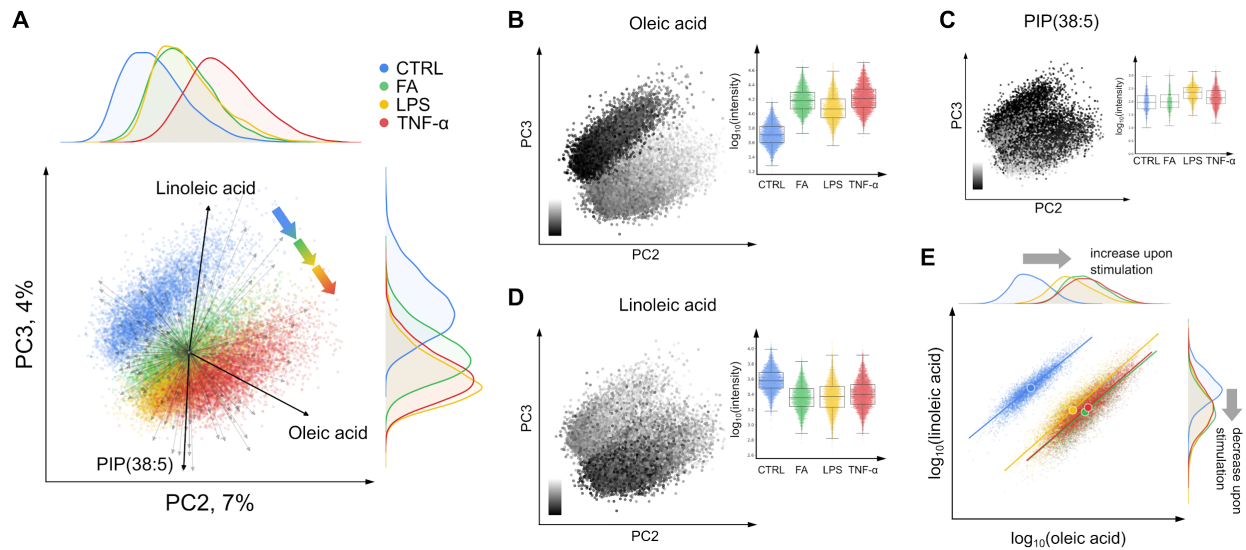

361  
 362 **Figure 6. Single-cell statistical analysis of steatotic differentiated human hepatocytes**  
 363 ***dHepaRG* stimulated with the fatty acids, LPS, and TNF $\alpha$  (n=22258).** **A:** PCA of z-scores of  
 364 the single-cell profiles of 136 metabolites; biplot vectors visualize contributions of individual  
 365 metabolites; gradient-colored arrows illustrate the metabolomes transitions from the untreated  
 366 cells (CTRL, n=5654) to the cells cultured with oleic and palmitic fatty acids (FA, n=4972), with  
 367 LPS and the fatty acids (LPS, n=5062), or with TNF $\alpha$  and the fatty acids (TNF $\alpha$ , n=6570). **B-D:**  
 368 Single-cell metabolite intensities mapped onto the PCA plot and the Tukey box plots per  
 369 condition (25%-75% percentiles, whiskers at 1.5x distance of the interquartile range); only cells  
 370 with non-zero metabolite intensity are shown; see Figure 14 for AMP and glutathione. **E:** Single-  
 371 cell scatterplot for intensities of linoleic vs. oleic acids showing an inverse relationship in  
 372 intracellular levels of these fatty acids upon stimulation and their tight and condition-  
 373 independent correlation; the centers of masses and fitted lines are plotted. Oleic acid, linoleic  
 374 acid, and PIP(38:5) were validated using LC-MS/MS (Data S1).

375

376

377 **SpaceM discovers association of PIP(38:5) with high cell-cell contact**

378 Finally, we investigated the spatio-molecular organization of human hepatocytes (Figure 7A-D).  
379 LD540-fluorescence microscopy revealed lipid accumulation within groups of cells that display  
380 high cell-cell contact (Figure S5, S6). Among all the detected metabolites, phosphatidylinositol  
381 phosphate PIP(38:4) (although not validated with LC-MS/MS) and PIP(38:5) were most highly  
382 associated with cell-cell contact (Figure 7B, Figure S7). PIPs are precursors of PIP3, a signaling  
383 phospholipid in the plasma membrane, which might explain their elevation within adjacent cells  
384 in a locally-concerted manner. Not all detected metabolites displayed such an association: AMP  
385 showed no correlation (Figure 7C) whereas oleic acid showed a negative correlation (Figure 7D).  
386 Thus, integrating fluorescent, morphological, spatial, and molecular information can be a  
387 powerful approach to explore multi-cellular phenomena (Bray et al., 2016).

388

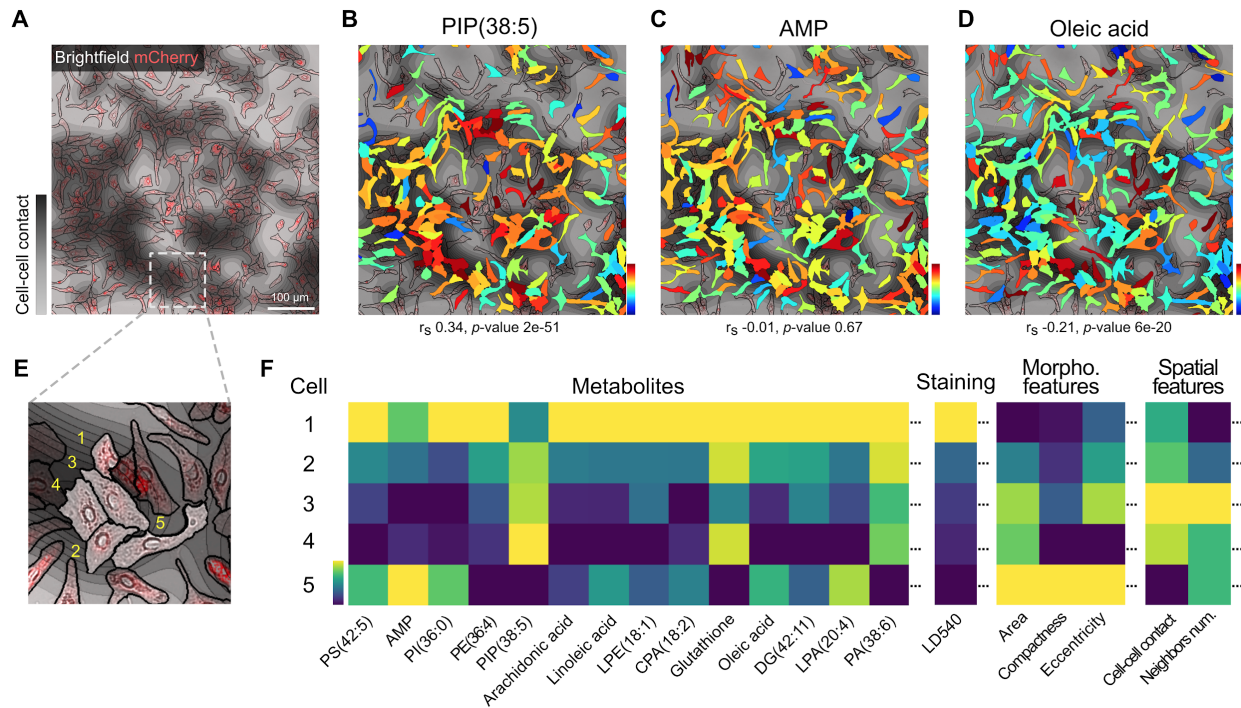

389

390 **Figure 7. Single-cell statistical analysis of steatotic differentiated human hepatocytes**

391 **stimulated with pro-inflammatory factors (n=22258). A:** TNF $\alpha$  hepatocytes with areas of local

392 crowding; the red LD540 fluorescence intensity indicates the accumulation of lipid droplets from

393 low steatosis to macrovesicular steatosis. **B-D:** Single-cell molecular images for PIP(38:5),

394 AMP, and oleic acid. Next to PIP(38:4), PIP(38:5) is the second most correlated molecule with

395 cell-cell contact, indicating its potential concerted elevation within adjacent cells. Oleic acid,

396 linoleic acid, AMP, glutathione, and PIP(38:5) were validated using LC-MS/MS (Data S1). **E-F:**

397 Illustration of a part of spatio-molecular matrix for five selected cells that represents single-cell

398 phenotypic information (LD540 fluorescence quantifying the extent of the macrovesicular

399 steatosis), morpho-spatial features (including cell-cell contact), and metabolite intensities.

## 400 Discussion

401 Here, we presented SpaceM, a novel method for the spatial single-cell analysis of intracellular  
402 metabolomes of cultured cells. SpaceM not only detects metabolites in individual cells using  
403 MALDI but, critically, integrates MALDI analysis with microscopy and is supplied with data  
404 analysis strategies for metabolite annotation, intensities normalization, selection intracellular  
405 metabolites and filtering out poor quality cells. The method demonstrated to be robust and  
406 reproducible, allowing us to analyze several conditions and replicates, obtaining metabolic  
407 profiles of around 100 metabolites from over 30.000 cells.

408 We benchmarked the method by analysing the co-cultured human HeLa cells and mouse  
409 NIH3T3 fibroblasts. The single-cell metabolic profiles detected by SpaceM were rich enough to  
410 predict the cell type with 90.4% accuracy with the single-cell resolution. Surprisingly, we  
411 detected metabolic intermixing of different cell types upon co-culturing, a yet unreported  
412 biological phenomenon. Our investigations indicated that the observed intermixing is a short-  
413 distance effect, namely, its extent depends on the presence of cells of other type in close vicinity.  
414 We carefully considered all other confounding factors and outruled sampling inaccuracies or  
415 metabolite delocalization. All our results indicate that intracellular metabolomes of cells of one  
416 type are indeed influenced by the neighboring cells of another type, with NIH3T3 cells affected  
417 stronger than HeLa cells.

418 For molecular detection, SpaceM exploits MALDI-imaging thus inheriting the advantages of this  
419 technique, in particular the capacity for untargeted metabolomics. We demonstrated it by  
420 detecting profiles encompassing 88 (for HeLa and NIH3T3) and 136 (for dHepaRG) metabolite  
421 annotations on the level 2 according to the Metabolomics Standards Initiative (Sumner et al.,

422 2007). The use of METASPACE for metabolite annotation was instrumental in the  
423 interpretation, quality control, and fast access to the metabolite images of the collected MALDI-  
424 imaging data, as METASPACE efficiently reduces millions of mass-to-charge values to tens of  
425 metabolite annotations in a False Discovery Rate-controlled manner. SpaceM is not limited to  
426 lipids, fatty acids and such small molecules as AMP or glutathione (Figure S8, Data S1) but can  
427 be extended to other molecular classes by using another MALDI-imaging protocol. In the HeLa-  
428 NIH3T3 co-culture benchmarking experiment, even when using just a half of the 88 detected  
429 metabolites, we could predict the cell type with 87.6% accuracy that affirms the richness of the  
430 metabolic profiles detected by SpaceM.

431 SpaceM was enabled by MALDI-imaging achieving the single-cell spatial resolution. However,  
432 it is almost impossible to sample highly-confluent cell monolayers without co-ablating several  
433 cells at once. Moreover, the sample preparation for MALDI-imaging, particularly matrix  
434 application, can negatively affect the spatial resolution. Thus, we set to prove the single-cell  
435 nature of the method, especially because it was essential to exclude possible technical reasons for  
436 the observed metabolic intermixing between HeLa and NIH3T3. For this, we developed a  
437 strategy to consider for each metabolite its delocalization outside the cell perimeter. This led to  
438 revelation that, first, the extent of delocalization is metabolite-specific, and second, even for the  
439 minority of metabolites characterized as delocalized, the median delocalization is comparable to  
440 the average size of a single cell. Moreover, in our benchmarking experiment, discarding  
441 delocalized metabolites did not affect the accuracy of the cell type prediction much. Altogether,  
442 these novel delocalization analyses confirm the single-cell nature of the SpaceM method. We  
443 hypothesize that the delocalization happens during spraying the MALDI matrix solution but do  
444 not have yet a definite answer what makes some metabolites delocalized while the majority of

445 metabolites were detected well-localized within the cell perimeter. For example,  
446 lysophosphoethanolamine LPE(18:1) was found to be well-localized whereas the structurally  
447 similar but saturated LPE(18:0) was found to be delocalized.

448 Compared to other reported single-cell metabolomics methods, e.g. microwells (Ibáñez et al.,  
449 2013) or microsampling (Guillaume-Gentil et al., 2017) approaches, SpaceM analyzes cells *in*  
450 *situ* in their native spatial context, ensures minimal unwanted perturbation, and preserves  
451 information about the microenvironment and spatial organization of cells. In contrast to micro-  
452 and nano-sampling methods, SpaceM is also a high-throughput method able to analyze over  
453 10000 cells and at the same time, as we illustrated, detecting rich metabolic profiles. Compared  
454 to a microscopy-guided laser ablation approach (Do et al., 2017), SpaceM uses unbiased  
455 sampling that facilitates discovery of cell populations which cannot be discriminated by  
456 microscopy, helps distinguish intracellular from extracellular signals, and also capitalizes on a  
457 softer MALDI ionization better suited for biomolecules. Compared to ultra-high spatial  
458 resolution approaches (Passarelli et al., 2017), SpaceM makes possible a high throughput  
459 analysis of large populations of cells to investigate their heterogeneity and to discover rare  
460 molecular phenotypes. The combination of these strengths makes SpaceM not only a single-cell  
461 but also a spatial method. We demonstrated the spatial capacity of SpaceM by discovering short-  
462 distance effect of metabolic intermixing between HeLa and NIH3T3 cells and by associating  
463 PIPs with high cell-cell contact.

464 We expect SpaceM to be broadly applicable to any adherent cells cultured in a monolayer,  
465 avoiding growing on top of each other that can lead to increased co-sampling. In our experience,  
466 cell culturing for SpaceM is relatively straightforward and can be evaluated following  
467 conventional cell biology practices by paying attention to the cell count, viability and

468 confluence. SpaceM allows for the determination of cells that are different in their response to  
469 changes in the microenvironment, which enables the identification of novel molecular  
470 mechanism involved in critical biological processes.

471 SpaceM contributes to the growing field of single-cell -omics methods by providing the missing  
472 capacities for spatio-molecular *in situ* analysis. Future experiments will aim to translate SpaceM  
473 to the level of tissue sections. Our method will be particularly useful to investigate health and  
474 disease phenomena associated with metabolic reprogramming, spatial organization and/or  
475 cellular heterogeneity such as differentiation, infection, drug metabolism, immunity, and cancer.

## 476 Acknowledgements

477 We thank Nassos Typas for advising on biology and providing access to the microscope, Bashir  
478 El Debs and Joel Selkrig for training on the microscopy and cell culturing (all EMBL), Andrew  
479 Palmer (EMBL) for training and support on MALDI-imaging, Megan Stanifer and Steeve  
480 Boulant (DKFZ) for their support and training on the cell culturing, METASPACE software  
481 development team (EMBL) for creating and supporting the METASPACE software, Carina  
482 Beatrice Vibe (EMBL) for her support and feedback on the manuscript, Angela Andersen (Life  
483 Science Editors) for scientific editing, Samantha Seah and Christoph Merten (EMBL) for  
484 providing the NIH3T3-GFP cell line, Fabian Merkel and Christian Häring (EMBL) for providing  
485 the HeLa Kyoto H2B-mCherry cell line. We further thank other members of the Thesis Advisory  
486 Committee of L.R.: Anne-Claude Gavin (EMBL) and Britta Brügger (Heidelberg University).  
487 This work was supported by the European Union's Horizon 2020 program under the grant  
488 agreements 634402 (T.A.) and 667273 (M.H.), the DKFZ-MOST cooperation program (M.H.,



489 M.S.), Darwin Trust of Edinburgh (S.T.), SFB Transregio grants 179, 209, and 1335 (all M.H.),  
490 and the ERC Consolidator grants HepatoMetaboPath (M.H.) and METACELL (T.A.).

## 491 Author Contributions

492 L.R. and T.A. conceived the research. L.R. developed the method. T.A. supervised the study.  
493 S.T. performed the co-culture experiment. P.P. performed LC-MS/MS validation. M.S. and M.H.  
494 contributed with the hepatocytes model, conceived the treatment design. M.S. cultured and  
495 prepared hepatocytes. L.R., M.S., M.H. and T.A. interpreted data. L.R. and T.A. wrote the paper.  
496 M.S. and M.H. contributed to the paper writing.

## 497 Declaration of Interests

498 L.R. and T.A. are the inventors on a patent application describing a spatial single-cell  
499 metabolomics method. T.A. is a consultant and a member of the scientific advisory board of  
500 SCiLS, a Bruker company developing software for MALDI-imaging.

501

502

503



## 504 References

- 505 Altschuler, S.J., and Wu, L.F. (2010). Cellular heterogeneity: do differences make a difference?  
506 *Cell* *141*, 559–563.
- 507 Baker, T.C., Han, J., and Borchers, C.H. (2017). Recent advancements in matrix-assisted laser  
508 desorption/ionization mass spectrometry imaging. *Curr. Opin. Biotechnol.* *43*, 62–69.
- 509 Beutler, B. (2004). Inferences, questions and possibilities in Toll-like receptor signalling. *Nature*  
510 *430*, 257–263.
- 511 Bray, M.-A., Singh, S., Han, H., Davis, C.T., Borgeson, B., Hartland, C., Kost-Alimova, M.,  
512 Gustafsdottir, S.M., Gibson, C.C., and Carpenter, A.E. (2016). Cell Painting, a high-content  
513 image-based assay for morphological profiling using multiplexed fluorescent dyes. *Nat. Protoc.*  
514 *11*, 1757–1774.
- 515 Buck, M.D., Sowell, R.T., Kaech, S.M., and Pearce, E.L. (2017). Metabolic Instruction of  
516 Immunity. *Cell* *169*, 570–586.
- 517 Carpenter, A.E., Jones, T.R., Lamprecht, M.R., Clarke, C., Kang, I.H., Friman, O., Guertin,  
518 D.A., Chang, J.H., Lindquist, R.A., Moffat, J., et al. (2006). CellProfiler: image analysis  
519 software for identifying and quantifying cell phenotypes. *Genome Biol.* *7*, R100.
- 520 Do, T.D., Comi, T.J., Dunham, S.J.B., Rubakhin, S.S., and Sweedler, J.V. (2017). Single Cell  
521 Profiling Using Ionic Liquid Matrix-Enhanced Secondary Ion Mass Spectrometry for Neuronal  
522 Cell Type Differentiation. *Anal. Chem.* *89*, 3078–3086.
- 523 Folch, J., Lees, M., and Sloane Stanley, G.H. (1957). A simple method for the isolation and  
524 purification of total lipides from animal tissues. *J. Biol. Chem.* *226*, 497–509.
- 525 Fortin, J.-P., Cullen, N., Sheline, Y.I., Taylor, W.D., Aselcioglu, I., Cook, P.A., Adams, P.,  
526 Cooper, C., Fava, M., McGrath, P.J., et al. (2017). Harmonization of cortical thickness  
527 measurements across scanners and sites. *Neuroimage* *167*, 104–120.
- 528 Gluchowski, N.L., Becuwe, M., Walther, T.C., and Farese, R.V., Jr (2017). Lipid droplets and  
529 liver disease: from basic biology to clinical implications. *Nat. Rev. Gastroenterol. Hepatol.* *14*,  
530 343–355.
- 531 Gripon, P., Rumin, S., Urban, S., Le Seyec, J., Glaise, D., Cannie, I., Guyomard, C., Lucas, J.,  
532 Trepo, C., and Guguen-Guillouzo, C. (2002). Infection of a human hepatoma cell line by  
533 hepatitis B virus. *Proc. Natl. Acad. Sci. U. S. A.* *99*, 15655–15660.
- 534 Grün, D., and van Oudenaarden, A. (2015). Design and Analysis of Single-Cell Sequencing  
535 Experiments. *Cell* *163*, 799–810.
- 536 Guillaume-Gentil, O., Rey, T., Kiefer, P., Ibáñez, A.J., Steinhoff, R., Brönnimann, R., Dorwling-

- 537 Carter, L., Zambelli, T., Zenobi, R., and Vorholt, J.A. (2017). Single-Cell Mass Spectrometry of  
538 Metabolites Extracted from Live Cells by Fluidic Force Microscopy. *Anal. Chem.* *89*, 5017–  
539 5023.
- 540 Ibáñez, A.J., Fagerer, S.R., Schmidt, A.M., Urban, P.L., Jefimovs, K., Geiger, P., Dechant, R.,  
541 Heinemann, M., and Zenobi, R. (2013). Mass spectrometry-based metabolomics of single yeast  
542 cells. *Proc. Natl. Acad. Sci. U. S. A.* *110*, 8790–8794.
- 543 Ilicic, T., Kim, J.K., Kolodziejczyk, A.A., Bagger, F.O., McCarthy, D.J., Marioni, J.C., and  
544 Teichmann, S.A. (2016). Classification of low quality cells from single-cell RNA-seq data.  
545 *Genome Biol.* *17*, 29.
- 546 Jung, U.J., and Choi, M.-S. (2014). Obesity and its metabolic complications: the role of  
547 adipokines and the relationship between obesity, inflammation, insulin resistance, dyslipidemia  
548 and nonalcoholic fatty liver disease. *Int. J. Mol. Sci.* *15*, 6184–6223.
- 549 Lee, M.-C.W., Lopez-Diaz, F.J., Khan, S.Y., Tariq, M.A., Dayn, Y., Vaske, C.J., Radenbaugh,  
550 A.J., Kim, H.J., Emerson, B.M., and Pourmand, N. (2014). Single-cell analyses of transcriptional  
551 heterogeneity during drug tolerance transition in cancer cells by RNA sequencing. *Proc. Natl.*  
552 *Acad. Sci. U. S. A.* *111*, E4726–E4735.
- 553 Marioni, J.C., and Arendt, D. (2017). How Single-Cell Genomics Is Changing Evolutionary and  
554 Developmental Biology. *Annu. Rev. Cell Dev. Biol.* *33*, 537–553.
- 555 Merrill, C.B., Basit, A., Armirotti, A., Jia, Y., Gall, C.M., Lynch, G., and Piomelli, D. (2017).  
556 Patch clamp-assisted single neuron lipidomics. *Sci. Rep.* *7*, 5318.
- 557 Murphy, M.P., and O’Neill, L.A.J. (2018). Krebs Cycle Reimagined: The Emerging Roles of  
558 Succinate and Itaconate as Signal Transducers. *Cell* *174*, 780–784.
- 559 Otsu, N. (1979). A threshold selection method from gray-level histograms. *IEEE Trans. Syst.*  
560 *Man Cybern.* *9*, 62–66.
- 561 Palmer, A., Trede, D., and Alexandrov, T. (2016). Where imaging mass spectrometry stands:  
562 here are the numbers. *Metabolomics* *12*, 1–3.
- 563 Palmer, A., Phapale, P., Chernyavsky, I., Lavigne, R., Fay, D., Tarasov, A., Kovalev, V.,  
564 Fuchser, J., Nikolenko, S., Pineau, C., et al. (2017). FDR-controlled metabolite annotation for  
565 high-resolution imaging mass spectrometry. *Nat. Methods* *14*, 57–60.
- 566 Passarelli, M.K., Pirkel, A., Moellers, R., Grinfeld, D., Kollmer, F., Havelund, R., Newman, C.F.,  
567 Marshall, P.S., Arlinghaus, H., Alexander, M.R., et al. (2017). The 3D OrbiSIMS-label-free  
568 metabolic imaging with subcellular lateral resolution and high mass-resolving power. *Nat.*  
569 *Methods* *14*, 1175–1183.
- 570 Patel, A.P., Tirosh, I., Trombetta, J.J., Shalek, A.K., Gillespie, S.M., Wakimoto, H., Cahill, D.P.,  
571 Nahed, B.V., Curry, W.T., Martuza, R.L., et al. (2014). Single-cell RNA-seq highlights  
572 intratumoral heterogeneity in primary glioblastoma. *Science* *344*, 1396–1401.

- 573 Pavlova, N.N., and Thompson, C.B. (2016). The Emerging Hallmarks of Cancer Metabolism.  
574 *Cell Metab.* *23*, 27–47.
- 575 Pelkmans, L. (2012). Cell Biology. Using cell-to-cell variability--a new era in molecular biology.  
576 *Science* *336*, 425–426.
- 577 Preibisch, S., Saalfeld, S., and Tomancak, P. (2009). Globally optimal stitching of tiled 3D  
578 microscopic image acquisitions. *Bioinformatics* *25*, 1463–1465.
- 579 Protsyuk, I., Melnik, A.V., Nothias, L.-F., Rappenz, L., Phapale, P., Aksenov, A.A., Bouslimani,  
580 A., Ryazanov, S., Dorrestein, P.C., and Alexandrov, T. (2018). 3D molecular cartography using  
581 LC-MS facilitated by Optimus and 'ili software. *Nat. Protoc.* *13*, 134–154.
- 582 Ress, C., and Kaser, S. (2016). Mechanisms of intrahepatic triglyceride accumulation. *World J.*  
583 *Gastroenterol.* *22*, 1664–1673.
- 584 Rubakhin, S.S., Lanni, E.J., and Sweedler, J.V. (2013). Progress toward single cell  
585 metabolomics. *Curr. Opin. Biotechnol.* *24*, 95–104.
- 586 Russell, A.B., Trapnell, C., and Bloom, J.D. (2018). Extreme heterogeneity of influenza virus  
587 infection in single cells. *Elife* *7*.
- 588 Sharma, U., and Rando, O.J. (2017). Metabolic Inputs into the Epigenome. *Cell Metab.* *25*, 544–  
589 558.
- 590 Sharon, G., Garg, N., Debelius, J., Knight, R., Dorrestein, P.C., and Mazmanian, S.K. (2014).  
591 Specialized metabolites from the microbiome in health and disease. *Cell Metab.* *20*, 719–730.
- 592 da Silva-Santi, L.G., Antunes, M.M., Caparroz-Assef, S.M., Carbonera, F., Masi, L.N., Curi, R.,  
593 Visentainer, J.V., and Bazotte, R.B. (2016). Liver Fatty Acid Composition and Inflammation in  
594 Mice Fed with High-Carbohydrate Diet or High-Fat Diet. *Nutrients* *8*.
- 595 Soltwisch, J., Ketting, H., Vens-Cappell, S., Wiegelmann, M., Müthing, J., and Dreisewerd, K.  
596 (2015). Mass spectrometry imaging with laser-induced postionization. *Science* *348*, 211–215.
- 597 Spandl, J., White, D.J., Peychl, J., and Thiele, C. (2009). Live cell multicolor imaging of lipid  
598 droplets with a new dye, LD540. *Traffic* *10*, 1579–1584.
- 599 Sumner, L.W., Amberg, A., Barrett, D., Beale, M.H., Beger, R., Daykin, C.A., Fan, T.W.-M.,  
600 Fiehn, O., Goodacre, R., Griffin, J.L., et al. (2007). Proposed minimum reporting standards for  
601 chemical analysis Chemical Analysis Working Group (CAWG) Metabolomics Standards  
602 Initiative (MSI). *Metabolomics* *3*, 211–221.
- 603 Wellen, K.E., and Thompson, C.B. (2012). A two-way street: reciprocal regulation of  
604 metabolism and signalling. *Nat. Rev. Mol. Cell Biol.* *13*, 270–276.
- 605 Wishart, D.S., Knox, C., Guo, A.C., Eisner, R., Young, N., Gautam, B., Hau, D.D., Psychogios,  
606 N., Dong, E., Bouatra, S., et al. (2009). HMDB: a knowledgebase for the human metabolome.

607 Nucleic Acids Res. 37, D603–D610.

608 Wolf, M.J., Adili, A., Piotrowitz, K., Abdullah, Z., Boege, Y., Stemmer, K., Ringelhan, M.,  
609 Simonavicius, N., Egger, M., Wohlleber, D., et al. (2014). Metabolic activation of intrahepatic  
610 CD8+ T cells and NKT cells causes nonalcoholic steatohepatitis and liver cancer via cross-talk  
611 with hepatocytes. *Cancer Cell* 26, 549–564.

612 Zenobi, R. (2013). Single-cell metabolomics: analytical and biological perspectives. *Science*  
613 342, 1243259.

614

## 615 **Methods**

### 616 **Co-culturing of HeLa and NIH3T3 cells**

617 HeLa Kyoto H2B-mCherry and NIH3T3-GFP cells were cultured at 37 °C with 5% CO<sub>2</sub>, and  
618 were maintained in high glucose DMEM (1X Pen/Strep) (Gibco/ThermoFisher Scientific,  
619 Bremen, Germany) supplemented with 10% FBS, 100 U/ml penicillin, 100 µg/ml streptomycin  
620 (Gibco) and 1 mM sodium pyruvate (Gibco). Cells were trypsinized with 0.25% trypsin-EDTA  
621 (Gibco) and split 1:10 twice a week. Two technical replicates for the co-cultures and one  
622 replicate for monoculture were used. Trypsinized cells were counted and cells were seeded on 4-  
623 well-glass labtek chamber slides (Lab-Tek II, CC2) (ThermoFisher Scientific). In the co-culture  
624 experiment, equal number of cells of each cell type was added into each well ( $4 \times 10^5$  cells/well).  
625 After 48h of incubation cells were washed with PBS. After washing, the cells were fixed for 15  
626 min with 4% paraformaldehyde (Sigma Aldrich, Darmstadt, Germany) at room temperature.  
627 Then the cells were stained with DAPI (1µg/ml) (ThermoFisher Scientific) in PBS for 20 min at  
628 room temperature.

### 629 **Hepatocytes culturing and stimulation**

630 HepaRG cell culture and differentiation was performed as described earlier (Gripon et al., 2002).  
631 Differentiated HepaRG (dHepaRG) cells were cultured on 4-well-glass chamber slides (Lab-Tek  
632 II, CC2, ThermoFisher Scientific, Bremen, Germany) ( $5.5 \times 10^4$  cells/well). The cells were  
633 stimulated with the fatty acids (opFAs): oleic acid (66 µM) and palmitic acid (33 µM), opFAs  
634 and tumor necrosis-alpha (TNFα) with the final concentration of 50 ng/ml (Recombinant Human  
635 TNF-alpha, and Systems), or opFAs and lipopolysaccharide (LPS) (100 ng/ml) (LPS from  
636 *E.coli*) (Sigma Aldrich) in Williams E Medium (William's Medium E, with stab. glutamine,

637 without Phenol Red, with 2,24 g/l NaHCO<sub>3</sub>) (PAN Biotech) for 24 h. Cells grown in Williams E  
638 Medium without supplement for 24 h were considered as a negative control. For each of those  
639 four conditions, cells were seeded in three different wells which were considered as technical  
640 replicates (Table S1). After washing, cells were fixed for 15 min with 4% paraformaldehyde  
641 (Sigma Aldrich) at room temperature. Then the cells were washed and stained with Hoechst  
642 (1 µg/ml) (Hoechst 33342) (ThermoFisher Scientific) and LD540 (0.1 µg/ml) (Spandl et al.,  
643 2009) in PBS for 30 min at room temperature. After washing, cells were stored in dH<sub>2</sub>O at 4 °C  
644 for one night maximum.

#### 645 **Preparing cells for imaging**

646 The plastic walls of the labtek were removed and the cells were dried in a Lab Companion™  
647 Cabinet Vacuum Desiccator for 16h at room temperature and -0.08 MPa. After complete  
648 desiccation of the cells, pen marks are manually drawn on the glass slide using a black alcohol  
649 pen model 140s black (Edding, Ahrensburg, Germany) to keep track of the glass slide orientation  
650 and for image registration. The marks were drawn on the same side as the cells. Cells are kept at  
651 4 °C until analysis. For the following experiments, the samples were analyzed by the microscopy  
652 and MALDI-imaging mass spectrometry following a randomized experimental design (Table  
653 S1).

654

655

#### 656 **Pre-MALDI bright-field and fluorescence microscopy of cells**

657 Fixed cells were sequentially observed with the camera Nikon DS-Qi2 (Nikon Instruments) with  
658 the Plan Fluor 10x (NA 0.30) objective (Nikon Instruments) mounted on the Nikon Ti-E inverted

659 microscope (Nikon Instruments) in bright-field and fluorescence (620 nm and 460 nm). The  
660 pixel size was 0.73  $\mu\text{m}$ . The microscope was controlled using the Nikon NIS Elements software.  
661 The tiled acquisition of each cell culture area was performed using the JOB functionality of the  
662 NIS software. Stitching of tiled frames was performed using the FIJI stitching plugin (Preibisch  
663 et al., 2009).

#### 664 **MALDI imaging mass spectrometry**

665 Relative humidity and temperature levels in the mass spectrometry room were monitored and  
666 controlled during the whole experiment and were within 44%-63% and 21.1-23.7  $^{\circ}\text{C}$  (Table S1).  
667 For the analysis of the lipid droplets (Figure 3), the 2,5-dihydroxybenzoic acid (DHB) matrix  
668 (Sigma Aldrich) 15mg/ml dissolved in 70% acetonitrile was applied onto the dried cells on the  
669 labtek slides by using a TM-Sprayer robotic sprayer (HTX Technologies, Carrboro, NC, USA).  
670 Spraying parameters were as following: temperature=100  $^{\circ}\text{C}$ , number of passes=8, flow  
671 rate=0.07 ml/min, velocity=1350 mm/min, track spacing=2 mm/min, pattern=CC, pressure=10  
672 psi, gas flow rate=5 l/min, drying time=15 sec, nozzle height=41 mm. The estimated matrix  
673 density was of 0.00311 mg/mm<sup>2</sup>. For investigating the molecular trends within all four  
674 considered conditions (Figure 4), the matrix 1,5-diaminonaphthalene (DAN) (Sigma Aldrich)  
675 10mg/ml dissolved in 70% acetonitrile was applied onto the dried cells on the labtek slides by  
676 using the same TM-Sprayer robotic sprayer. Spraying parameters were as following:  
677 temperature=90  $^{\circ}\text{C}$ , number of passes=8, flow rate=0.07 ml/min, velocity=1350 mm/min, track  
678 spacing=3 mm/min, pattern=CC, pressure=10 psi, gas flow rate=2 l/min, drying time=15 sec,  
679 nozzle height=41 mm. The estimated matrix density was of 0.001383 mg/mm<sup>2</sup>. For MALDI  
680 imaging mass spectrometry, the glass slides with the dried cells on them were mounted onto a  
681 custom slide adaptor and loaded into the AP-SMALDI source (Transmit, Giessen, Germany).

682 The MALDI laser focus was optimized manually using the source cameras with the focused  
683 beam diameter estimated to be between 15.0 and 43.0  $\mu\text{m}$  (mean equal to 29.9  $\mu\text{m}$ , standard  
684 deviation equal to 8  $\mu\text{m}$ ). The x-y step size (distance between the centers of ablation marks) was  
685 set to 50  $\mu\text{m}$ . For each pixel, the spectrum was accumulated from 30 laser shots at 60 Hz.  
686 Negative mode MS analysis was performed in the full scan mode in the mass range of 200-1100  
687 m/z (resolving power  $R=140000$  at m/z 200) using an QExactive Plus mass spectrometer  
688 (ThermoFisher Scientific). MS parameters in the Tune software (version 2.5 Build 2042,  
689 ThermoFisher Scientific) were set to the spray voltage of 4.10 kV, S-Lens 80 eV, capillary  
690 temperature 250 C. The data was converted from the RAW format into the imzML format  
691 containing only centroided data using the ImageQuest software, v.1.1.0 (ThermoFisher  
692 Scientific). Metabolite annotation was performed using the METASPACE cloud software  
693 (<http://metaspace2020.eu>) implementing the bioinformatics methods for False Discovery Rate-  
694 controlled annotation published by us earlier (Palmer et al., 2017) with the m/z tolerance of 3  
695 ppm and FDR of 10%, 20%, and 50% against the HMDB metabolite database v2.5 (Wishart et  
696 al., 2009).

### 697 **Post-MALDI microscopy to detect MALDI ablation marks**

698 The cells were imaged in bright-field microscopy after MALDI-imaging using the same  
699 microscopy setup and parameters as described earlier in the pre-MALDI microscopy section to  
700 define the positions of the ablation marks with respect to the fiducial marks.

### 701 **Association of laser ablation marks with single cells**

702 This is the key part of the method as it solves the challenge that single cells are not visible in the  
703 post-MALDI microscopy images due to the opaque layer of MALDI matrix covering cells. Here,  
704 ablation marks left by the MALDI laser were associated with single cells in three steps: a) cells



705 segmentation in the pre-MALDI microscopy images, b) detection of laser ablation marks in post-  
706 MALDI microscopy images, c) matching between ablation marks and MALDI mass spectra and  
707 d) co-registration of pre- and post-MALDI microscopy images to overlay the ablation marks  
708 with the segmented single cells.

709 In step a), cells were segmented using a custom pipeline in the CellProfiler software (Carpenter  
710 et al., 2006) where the DAPI staining channel was used to generate seeds for a region growing  
711 algorithm detecting cells boundaries in the LD540-staining channel. In step b), we first denoised  
712 the bright-field microscopy images by applying a low-pass filter in the 2D Fourier frequency  
713 domain, in particular to exploit both the regular distances between ablation marks as well as the  
714 repeated shape of the ablation mark itself. Then, we applied a contrast-enhancing filter (using the  
715 *clip* function from the Python module *numpy*) and Otsu's thresholding method (Otsu, 1979) to  
716 binarize the image (using the *imbinarize* function in Matlab). Then, we applied morphological  
717 image analysis operations of closing and then opening to fill in the holes in the image and to  
718 remove individual noisy pixels (using the *imclose* and *imopen* functions in Matlab). This  
719 provided estimations of the centers of mass of each ablation mark (Figure S9). In step c), we fit a  
720 theoretical rectangular grid to the ablation marks. The numbers of X- and Y- grid steps were  
721 defined as set up during the MALDI acquisition. The center of the acquisition region was  
722 considered as the center of the grid. The orientation of the grid with respect to the post-MALDI  
723 microscopy image was optimized by finding an angle which resulted in the best overlap between  
724 the grid lines and the detected ablation marks. The X- and Y-spacing of the grid were optimized  
725 by minimizing the distance between the grid nodes and the center of mass of the nearest neighbor  
726 ablation mark. Then, only ablation marks which were the nearest neighbors to the grid nodes  
727 were taken and re-indexed (Figure S10). This provided X- and Y-coordinates for each ablation

728 mark associated with a collected MALDI spectrum. In order to improve estimations of the  
729 ablations marks areas used later for normalization, their segmentation was further improved by  
730 applying a custom region-growing algorithm implemented in Python. In step d), co-registration  
731 of pre- and post-MALDI microscopy images was done based on the pen marks drawn on the  
732 edge of the wells used as fiducials. We first segmented the pen marks in both pre- and post-  
733 MALDI bright-field microscopy images using Otsu's intensity thresholding method. Then, we  
734 used the basin-hopping optimization algorithm (Python implementation from the *scipy* package  
735 v0.18.1) to find the best linear transformation matching the coordinates of the edges of the pen  
736 marks between the pre- and post-MALDI images (Figure S10). The optimal linear  
737 transformation was applied to the post-MALDI microscopy images to map the ablation marks to  
738 the pre-MALDI microscopy images. The initial assessment of the co-registration quality and  
739 overlaying of the metabolite intensities was performed in the `ili web app at <http://ili.embl.de>  
740 (Protsyuk et al., 2018).

#### 741 **Single-cell intensity normalization**

742 A normalized intensity of each metabolite in a single cell was constructed as follows. For each  
743 cell, we considered all ablation marks overlapping with the cell area and selected the associated  
744 ablation marks which overlap with the cell by over than 30% of their ablation area. The  
745 metabolite intensities coming from an ablation mark were normalized by dividing them by the  
746 ratio of the sampling area (defined as the number of pixels of the intersection of the ablation  
747 mark and any cell region) to the area of the ablation mark. Finally, for each cell its normalized  
748 metabolite intensities were calculated as the weighted average normalized intensities of the  
749 associated ablation marks where the weights are defined as the ratio of the shared pixels (Figure  
750 2). In order to account for the variations in permeabilization efficiency between the biological

751 replicates, single-cell LD540 fluorescence intensities were normalized by dividing them by the  
752 median DAPI intensity (median over a well).

### 753 **Selecting intracellular metabolites**

754 We selected metabolite annotations corresponding to intracellular metabolites as follows. First,  
755 for each ablation mark we assigned to it the inside-cells label having values either of zero or one  
756 based on whether the mark has any overlap with any cell. Then, for each metabolite ion image,  
757 its intensities were binarized to zero-one values by selecting a threshold leading to the highest  
758 Pearson correlation with the inside-cells labels. The threshold value was found using the basin-  
759 hopping optimization algorithm. In order to consider only intracellular metabolites for further  
760 analysis, we selected those metabolite annotations whose binarized ion images were correlated  
761 with the inside-cells labels with the Pearson correlation higher than 0.25. For the stimulated  
762 dHepaRG experiment where three replicates for each of four conditions were obtained, we  
763 considered the metabolite annotations which were shared by at least three samples (out of 12  
764 overall) that led to 136 annotations. For each metabolite annotation, we pulled the ion images  
765 with the m/z tolerance of 3ppm from the imzML files.

### 766 **Cell filtering and batch correction**

767 We filtered out 5% of cells with the lowest metabolite yield, namely the cells which had most  
768 zero-valued metabolites annotations, following the approach well-accepted in single-cell  
769 transcriptomics (Grün and van Oudenaarden, 2015) (Figure S11). In the stimulated HepaRG  
770 experiment, this filtered out 1240 cells out of 23498 overall. In the stimulated HepaRG  
771 experiment, to compensate for the batch effect between the biological replicates within each  
772 condition, we applied the *combat* batch correction algorithm (Fortin et al., 2017) originally

773 developed for single-cell transcriptomics data using its open-source Python implementation  
774 neuroCombat available at <https://github.com/ncullen93/neuroCombat> (Figure S4).

#### 775 **Cell type classification for the co-culture experiment**

776 The assignment of the cell type based on the constitutive fluorescence of the cells (mCherry for  
777 HeLa, GFP for NIH3T3) was done by finding a separating linear boundary between the two  
778 populations (Figure 2A). The resulting cell types provided the ground truth labels for the Linear  
779 Discriminant Analysis (LDA) performed using the Python *scikit-learn* LDA implementation  
780 (version 0.19.1).

#### 781 **LC-MS/MS validation of METASPACE annotations**

782 **Sample preparation:** Lipids and fatty acids were extracted using the Folch method (Folch et al.,  
783 1957) with chloroform:methanol (2.5:1). For lipidomics analysis, the dried samples were  
784 reconstituted in isopropanol:methanol (1:1) and injected 10uL into the LC-MS system. For  
785 metabolomics analysis, metabolites were extracted in 80% methanol and directly injected 20uL  
786 into the LC-MS system.

787 **LC-MS/MS methods for lipidomics:** All LC-MS/MS analyses were performed on a Vanquish  
788 Ultra-High Performance Liquid Chromatography (UHPLC) system coupled to a Q-Exactive Plus  
789 High Resolution Mass Spectrometry (HRMS) (ThermoFisher Scientific) with an electrospray  
790 ionization (ESI) source operated in either positive or negative mode. The separation of lipids and  
791 fatty acids was carried out using an Agilent Poroshell EC-C<sub>18</sub> column (3 x 50 mm; 2.7 μM)  
792 maintained at 40 °C at the flow rate of 0.26 ml/min. The mobile phase consisted of solvent A  
793 (acetonitrile–water (4:6)) and solvent B (isopropyl alcohol–acetonitrile (9:1)), which were  
794 buffered with either 10 mM ammonium acetate (for negative mode) or 10mM ammonium

795 formate acidified with 0.1% formic acid (for positive mode). The UHPLC gradient was set at  
796 20%, 20%, 45%, 52%, 66%, 70%, 75%, 97%, 97%, 20%, 20% of solvent B at the time points 0,  
797 1.5, 4, 5, 7, 8, 10, 12, 15, 16, 19 min, respectively. Fatty acids and lipids were detected with the  
798 HRMS full scan at the mass resolving power  $R=35000$  in the mass range of 100-1500  $m/z$ . The  
799 data-dependent tandem (MS/MS) mass scans for five most intense ions (TOP5) were obtained  
800 along with full scans using higher energy collisional dissociation (HCD) with normalized  
801 collision energies of 20, 30 and 40 units at the mass resolving power  $R=17500$ . The MS  
802 parameters in the Tune software (ThermoFisher Scientific) were set as: spray voltage of 4 kV,  
803 sheath gas 30 and auxiliary gas 5 units, S-Lens 65 eV, capillary temperature 320 °C and  
804 vaporization temperature of auxiliary gas was 300 °C.

805 **LC-MS/MS methods for metabolomics:** LC-MS/MS metabolomics analysis was carried out  
806 using an Xbridge BEH Amide column (100X 2.1 mm; 2.5  $\mu\text{M}$ ) maintained at 40 °C at the flow  
807 rate of 0.3 ml/min. The mobile phase consisted of solvent A (7.5 mM ammonium acetate with  
808 0.05%  $\text{NH}_4\text{OH}$ ) and solvent B (acetonitrile). The UHPLC gradient was set at 85%, 85%, 10%,  
809 10%, 85%, 85% of solvent B at the time points 0, 2, 12, 14, 14.1, 6 min, respectively.  
810 Metabolites were detected with HRMS full scan at the mass resolving power  $R=70000$  in mass  
811 range of 60-900  $m/z$ . The data-dependent MS/MS mass scans were obtained along with full scans  
812 using HCD of normalized collision energies of 10, 20 and 30 units which were at the mass  
813 resolving power  $R=17500$ . The MS parameters in the Tune software (ThermoFisher Scientific)  
814 were set as: spray voltage of 4 kV (for negative mode 3.5 kV), sheath gas 30 and auxiliary gas 5  
815 units, S-Lens 65 eV, capillary temperature 320 °C and vaporization temperature of auxiliary gas  
816 was 300 °C. Data was acquired in the full scan mode and MS/MS mass spectra for TOP5  
817 precursor ions.

818 **LC-MS/MS validation of METASPACE annotations:** LC-MS/MS validation of lipid and  
819 metabolite METASPACE annotations was performed either by comparing retention times, exact  
820 m/z (MS) and fragmentation pattern (MS/MS) spectra with authentic standards or by matching  
821 MS/MS spectra with the EMBL Metabolomics Core Facility (MCF) spectral library (available at  
822 <http://curatr.mcf.embl.de/>) and public spectral libraries (LipidBlast, LIPID MAPS and mzCloud).  
823 The details of annotation validation are summarized in Supplementary Data S1. The structural  
824 annotation procedure for head groups (HD) and fatty acid side chains (SD) is described in details  
825 in (Palmer et al., 2017).

## 826 **Data visualization**

827 All plots were generated in Python, version 3.6.2, by using the packages *matplotlib* 2.1 and  
828 *seaborn* 0.8.1. The Python package *scikit-learn* 0.19.1 was used for the Principal Component  
829 Analysis.

## 830 **Data availability**

831 All metabolite and lipid annotations and images are publicly available at the METASPACE  
832 online knowledgebase ([URL](#) for the co-cultured and mono-cultured HeLa and NIH3T3 cells  
833 from Figure 2, [URL](#) for the dHepaRG cells from Figure 3, [URL](#) for the dHepaRG cells from  
834 Figure 4).

835

836

837

838

839

## 840 Supplementary Figures

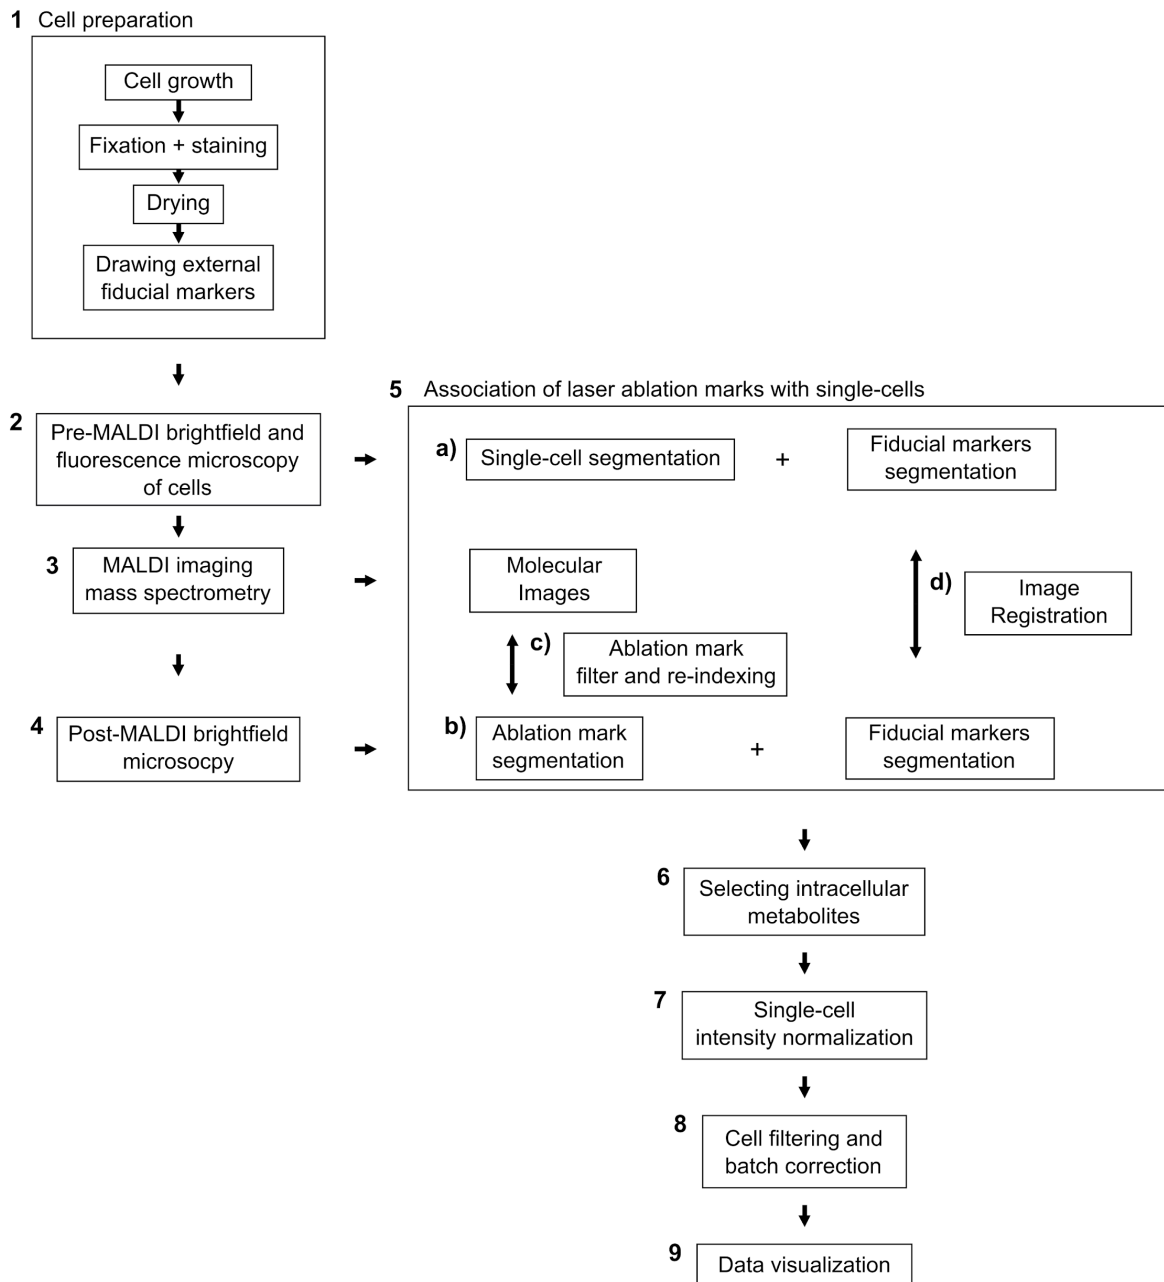

841

842 **Supplementary Figure S1.** Detailed workflow of the SpaceM method, see Figure 1 for a  
843 visualization of the workflow supplemented with visual elements.

844



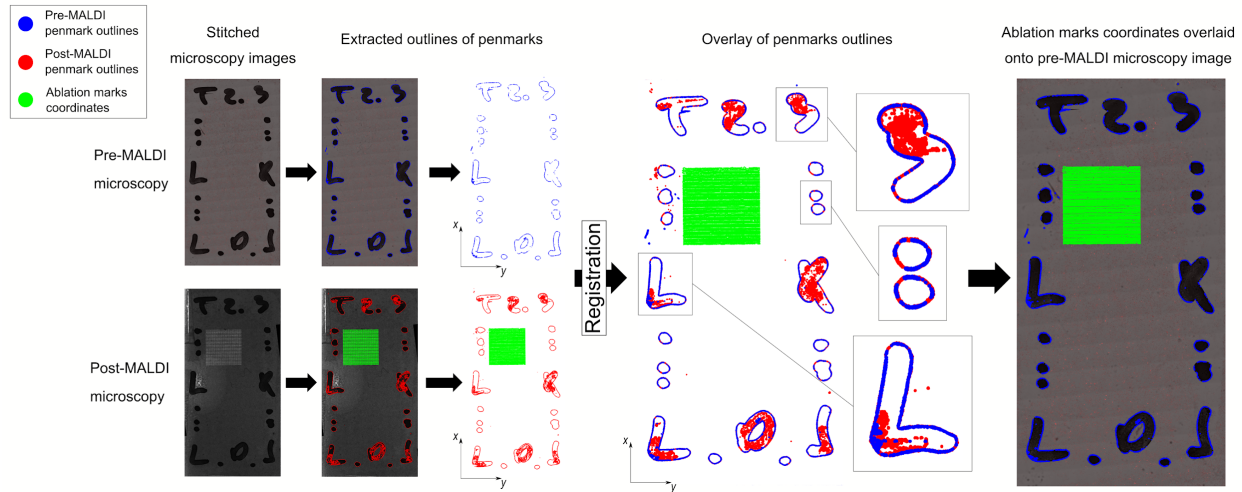

845

846 **Supplementary Figure S2.** Registration workflow of pre- and post-MALDI microscopy images.

847 The area where MALDI-imaging was applied is shown in green. The features of the pen marks  
848 used as fiducials are shown in blue (for pre-MALDI microscopy images) or red (for post-  
849 MALDI microscopy images).

850

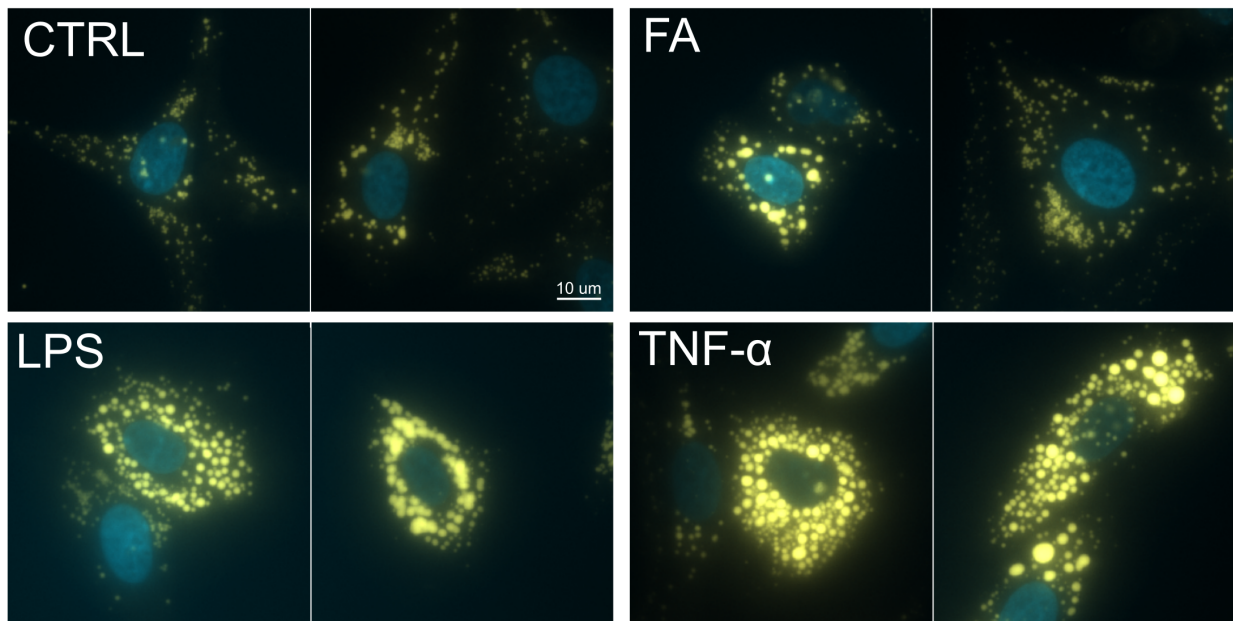

851

852 **Supplementary Figure S3.** Lipid accumulation, also known as macro-vesicular steatosis, in  
853 dHepaRG hepatocytes both inherently as well as under stimulation with: oleic and palmitic fatty

854 acids (FA), LPS in combination with the fatty acids, TNF $\alpha$  in combination with the fatty acids  
855 (yellow for LD540, blue for DAPI) to highlight the localization around nucleus. Each subplot  
856 shows two illustrative examples of cells.  
857

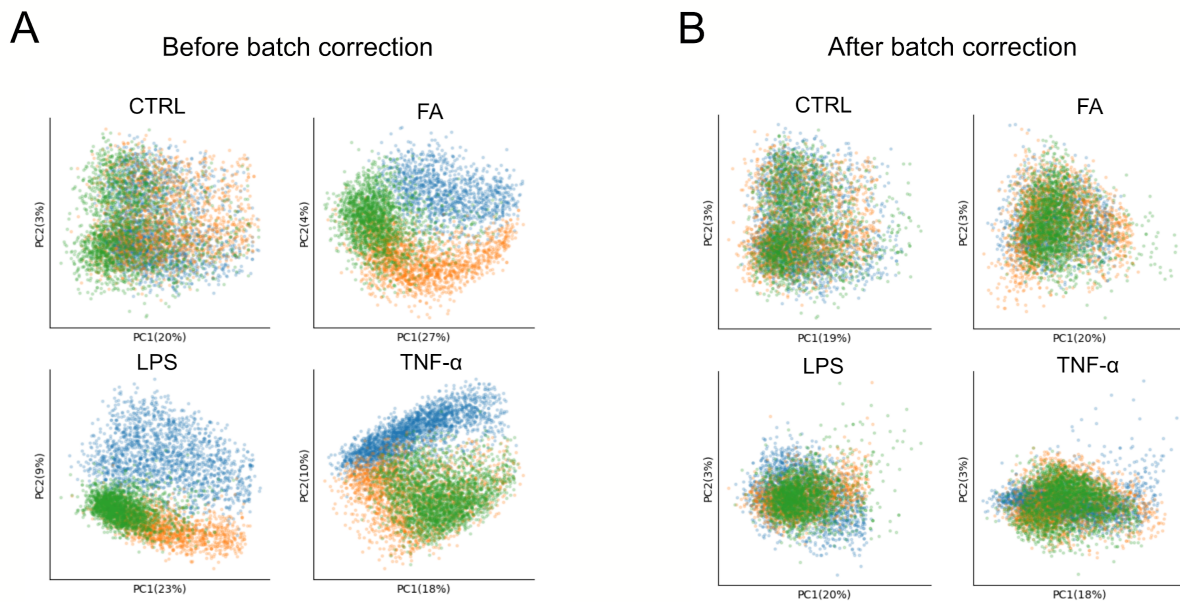

858  
859 **Supplementary Figure S4.** Batch correction of variability between technical replicates in the  
860 stimulated dHepaRG experiment by using the combat algorithm. The plots show a PCA plot of  
861 the single-cell metabolic profiles with cells color-coded according to the replicate. **A:** Before  
862 batch correction, **B:** after batch correction.  
863

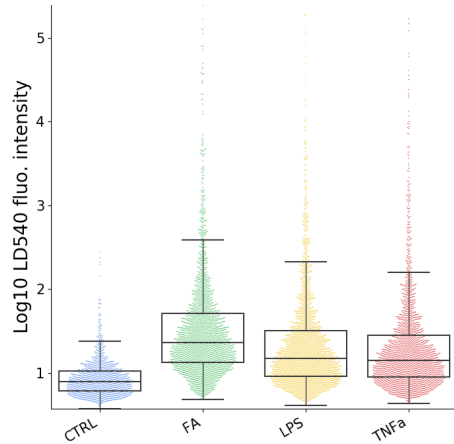

864

865 **Supplementary Figure S5.** Swarming plots of single-cell LD540-fluorescent intensities of  
866 stimulated dHepaRG cells for each condition indicating increased lipid accumulation upon  
867 stimulation with FAs, LPS, and TNF $\alpha$ .

868

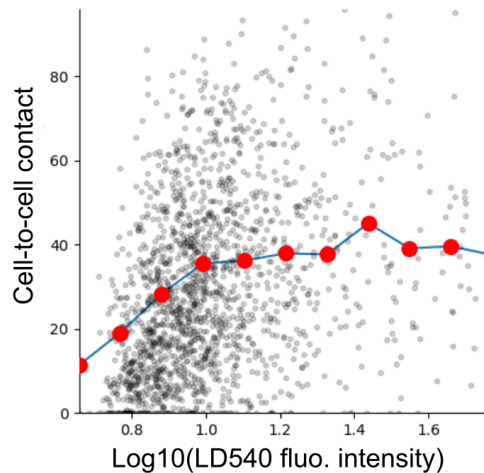

869

870 **Supplementary Figure S6.** Scatter plot of the LD540 fluorescent intensity and cell-cell contact  
871 for one replicate of dHepaRG cells stimulated with TNF $\alpha$  in combination with oleic and linoleic  
872 acid (n=1830), with the Spearman  $r_s$  0.34, p-value 9.18e-4. The LD540 intensities were  
873 thresholded at the 95% percentile. Red dots visualize average values for regularly-spaced bins of  
874 LD540 fluorescence intensity.

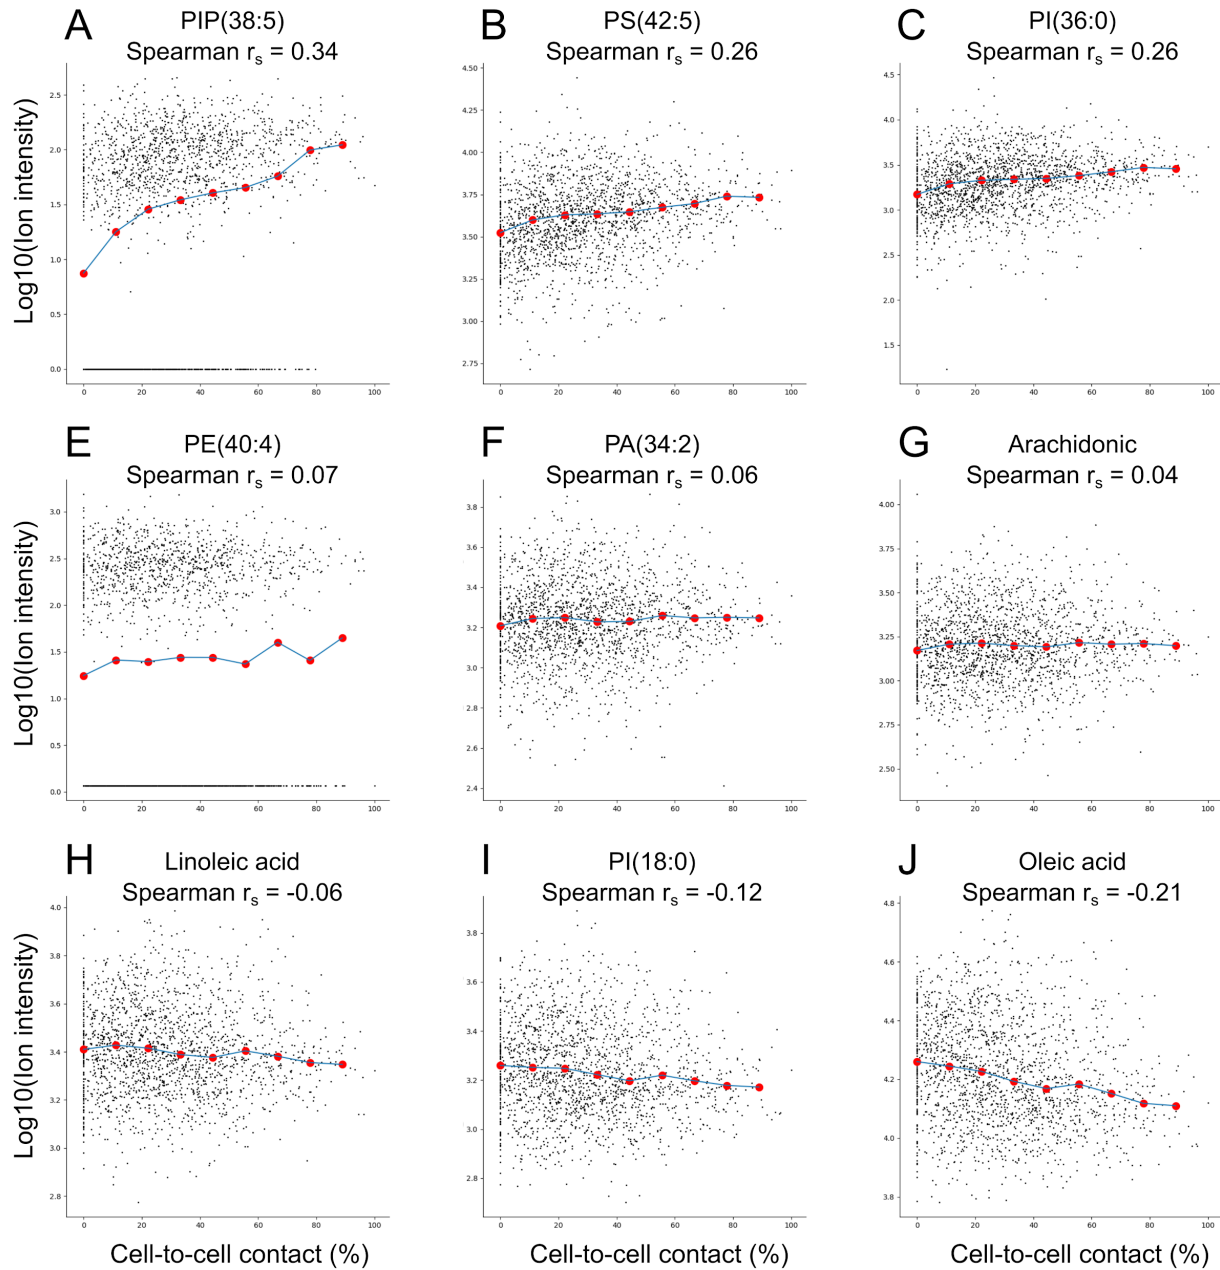

875

876 **Supplementary Figure S7.** Observed relationship between local crowding and intracellular

877 metabolite intensity. One dot represents one cell. Red dots represent average intensities for

878 regular bins of local crowdedness. The data are coming from one replicate of the TNF $\alpha$  condition

879 (1830 cells).

880



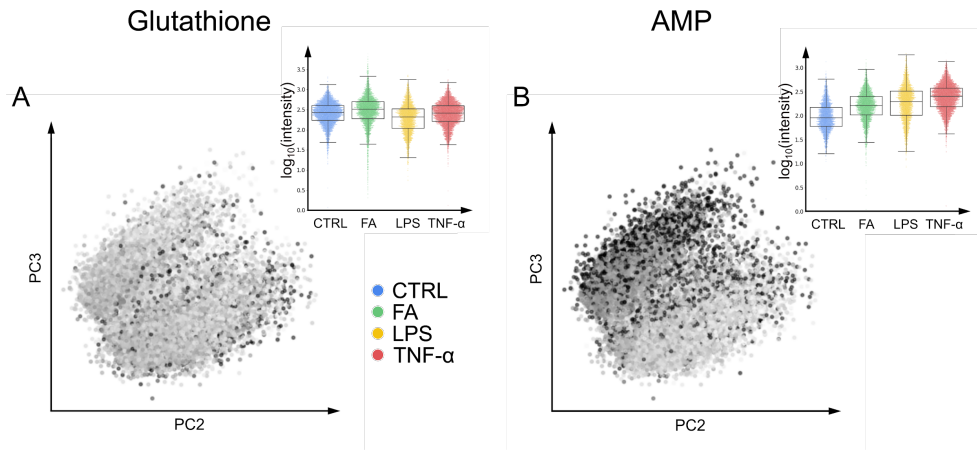

881

882 **Supplementary Figure S8.** Mapping of intensities of the small molecules glutathione and AMP

883 onto the principal components of z-scores of the single-cell metabolic profiles of dHepaRG cells

884 from the CTRL, FA, LPS, and TNF $\alpha$  conditions (similar to Figure 3B-D).

885

886

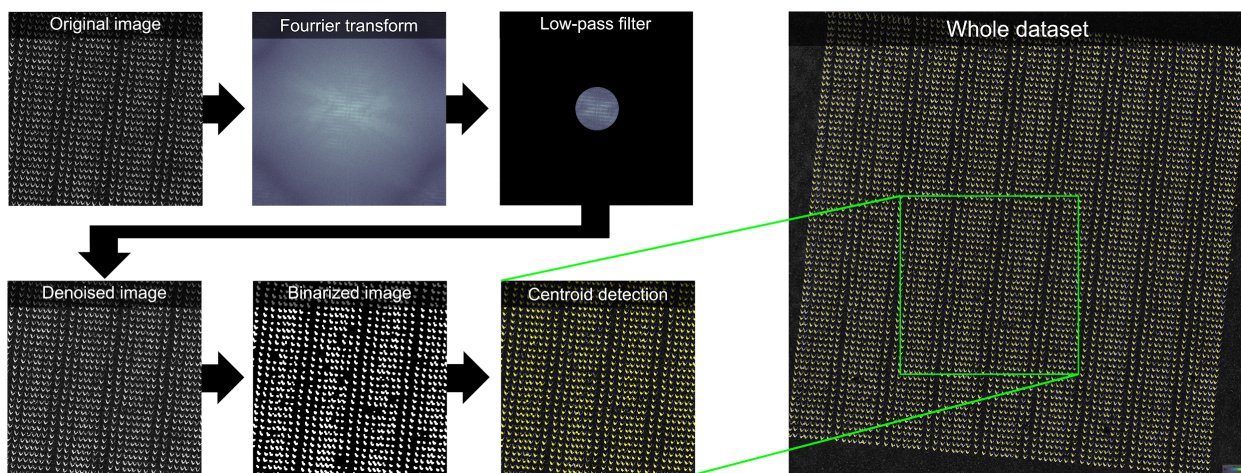

887

888 **Supplementary Figure S9.** Illustration of the procedure for detection of laser ablation marks in

889 post-MALDI microscopy images.

890

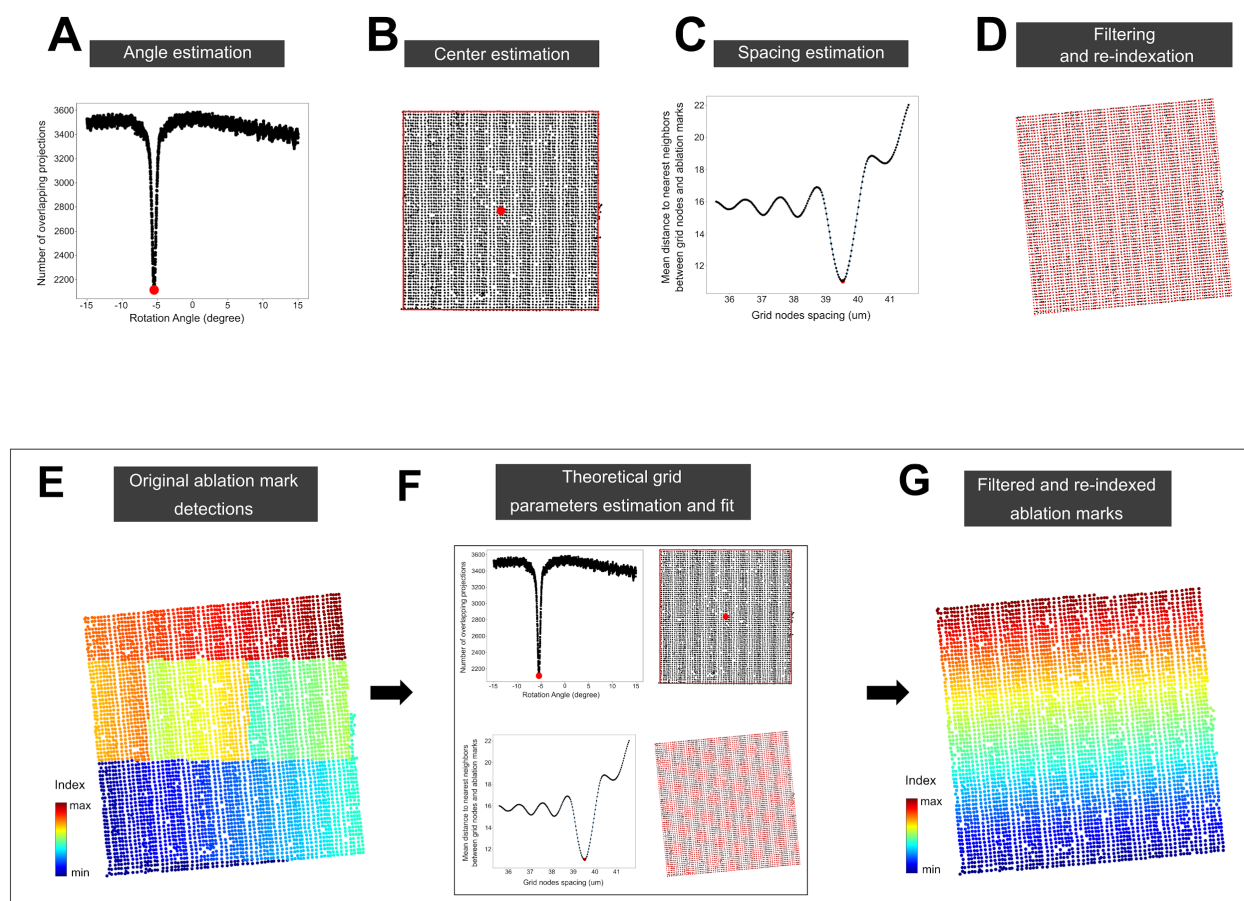

891

892 **Supplementary Figure S10.** Illustration of the procedure for fitting a theoretical rectangular

893 grid to the ablation marks segmented in the post-MALDI microscopy images. The three

894 parameters of the grid are estimated using the ablation marks coordinates. In A, the angle is

895 estimated by counting the number of non overlapping ablation marks coordinates projections of

896 the X axis for different rotation angle. The minimum number of projection is reached for an

897 alignment angle with the projection axis. In B, the center of the grid is estimated from the

898 extrema of the ablation mark coordinates. The spacing of the grid nodes is estimated in C by

899 measuring the mean distance to the nearest ablation mark to each grid node. The chosen grid

900 node spacing is leads to smallest mean distance to the ablation mark coordinates. The re-

901 indexing in D is done by choosing the closest ablation mark coordinates from the grid nodes

902 constructed using the parameters defined before (the grid nodes are shown in red, their nearest

903 ablation mark coordinates are shown in black). In E, the ablation mark coordinates are color  
904 coded by their index. An illustration of the different steps for fitting a grid onto the ablation mark  
905 coordinates as well as the re-indexing is shown in F. In G, the re-indexed ablation mark are  
906 shown, and re-indexing them to associate each detected ablation mark with a MALDI spectrum.  
907

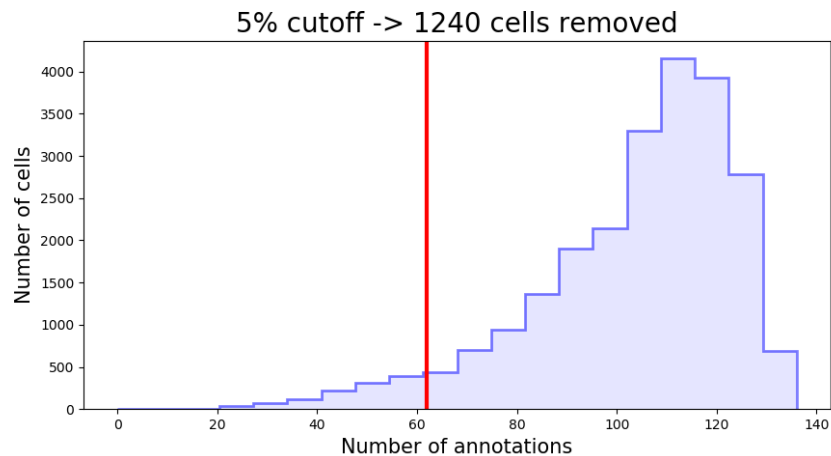

908  
909 **Supplementary Figure S11.** Filtering out poor quality cells for the dHepaRG experiment  
910 (Figure 4). The cells with low number of METASPACE annotations (less than the 5% lower  
911 percentile of the distribution) were removed.

912

913

914

915



916 **Supplementary Table**

| Sample<br>("Condition"<br>"Replicate<br>number") | Matrix application |                             |                         | MALDI-imaging     |                             |                         |
|--------------------------------------------------|--------------------|-----------------------------|-------------------------|-------------------|-----------------------------|-------------------------|
|                                                  | Date; Time         | Room<br>temperature<br>(°C) | Room<br>humidity<br>(%) | Date; Time        | Room<br>temperature<br>(°C) | Room<br>humidity<br>(%) |
| FA_1                                             | 22.06.17; 1.40pm   | 23.1                        | 58                      | 22.06.17; 2.01pm  | 23.1                        | 50                      |
| LPS_1                                            | 22.06.17; 4.10pm   | 23.2                        | 60                      | 22.06.17; 4.30pm  | 23.7                        | 49                      |
| FA_2                                             | 24.06.17; 12.40am  | 21.9                        | 52                      | 24.06.17; 1.00pm  | 23.3                        | 47                      |
| LPS_2                                            | 24.06.17; 3.50pm   | 21.9                        | 53                      | 24.06.17; 4.10pm  | 23.5                        | 47                      |
| Untreated_1                                      | 25.06.17; 6.30am   | 21.9                        | 52                      | 25.06.17; 7.00am  | 23                          | 48                      |
| TNFa_1                                           | 25.06.17; 12.15am  | 22.1                        | 60                      | 25.06.17; 3.30pm  | 23.6                        | 51                      |
| FA_3                                             | 25.06.17; 6.30am   | 21.9                        | 58                      | 25.06.17; 10.00am | 23.1                        | 47                      |
| TNFa_2                                           | 25.06.17; 9.15am   | 21.9                        | 60                      | 25.06.17; 9.35am  | 23.1                        | 52                      |
| Untreated_2                                      | 25.06.17; 12.41pm  | 21.5                        | 55                      | 25.06.17; 4.00pm  | 23.1                        | 47                      |
| Untreated_3                                      | 25.06.17; 12.41pm  | 21.5                        | 55                      | 25.06.17; 1.00pm  | 23.1                        | 46                      |
| LPS_3                                            | 28.06.17; 2.59pm   | 21.1                        | 63                      | 28.06.17; 6.30pm  | 23.3                        | 48                      |
| TNFa_3                                           | 30.06.17; 2.30pm   | 21.1                        | 50                      | 30.06.17; 6.41pm  | 22.6                        | 44                      |

917 **Supplementary Table S1.** *Experimental design and ambient conditions for matrix application*  
918 *and MALDI-imaging analysis of dHepaRG samples.*

919

920 **Supplementary Data (attached as a separate file)**

921 ***Supplementary Data S1. LC-MS/MS validation of METASPACE metabolite annotations.***

922 *Summary and detailed information about LC-MS/MS validation of METASPACE annotations*  
923 *including MS/MS and chromatographic information.*

924
